# Supplementary material for: The assignment of absolute configuration of cyanohydrins by NMR
Source: Royal Society of Chemistry journal article supplement (doi:10.1039/b517917c), 2006-01-01
Supplement: b517917c.pdf [file b517917c.pdf]

## Electronic Supplementary Information (ESI)

### The assignment of absolute configuration of cyanohydrins by NMR

Iria Louzao, José Manuel Seco, Emilio Quiñoá and Ricardo Riguera\*

*Departamento de Química Orgánica, Facultad de Química y Unidad de RMN de Biomoléculas Asociada al CSIC, Universidad de Santiago de Compostela, E-15782*

*Santiago de Compostela, Spain*

*Tel/Fax: (34) 981591091; E-mail: ricardo@usc.es*

**MPA esters of cyanohydrins: general experimental procedure.** The MPA esters were prepared by treatment of the cyanohydrin (1.0 equivalent) with the corresponding (*R*) and (*S*)-MPA (1.25 equivalents) in the presence of 1-(3-dimethylaminopropyl)-3-ethylcarbodiimide hydrochloride (EDC, 1.25 equivalents) and catalytic DMAP (20 mol%) in dry CH<sub>2</sub>Cl<sub>2</sub> and under a nitrogen atmosphere. The reaction mixtures were stirred at r.t. for 2 h. Next, the organic layers were sequentially washed with water, HCl (1N), water, NaHCO<sub>3</sub> (sat) and water. Then, the layers were dried (anh. NaSO<sub>4</sub>) and concentrated under reduced pressure to provide the corresponding esters. If needed, further purification was achieved by means of flash column chromatography (silica gel 230-400; elution with 9:1 to 4:1 hexanes/ethyl acetate mixtures; 63-95% yields after purification).

**NMR Spectroscopy.** 1D <sup>1</sup>H and <sup>13</sup>C and 2D COSY, TOCSY, HSQC and HMBC spectra of samples in CDCl<sub>3</sub> were recorded in 250, 300, 400 and 500 MHz. Chemical shifts (ppm) are internally referenced to the TMS signal (0 ppm) in <sup>1</sup>H-NMR spectra. <sup>13</sup>C-NMR spectra are referenced to the CDCl<sub>3</sub> signal. <sup>1</sup>H and <sup>13</sup>C-NMR spectra of MPA derivatives of compounds **1-13** and 9-AMA derivatives of compound **2** are shown in next pages.

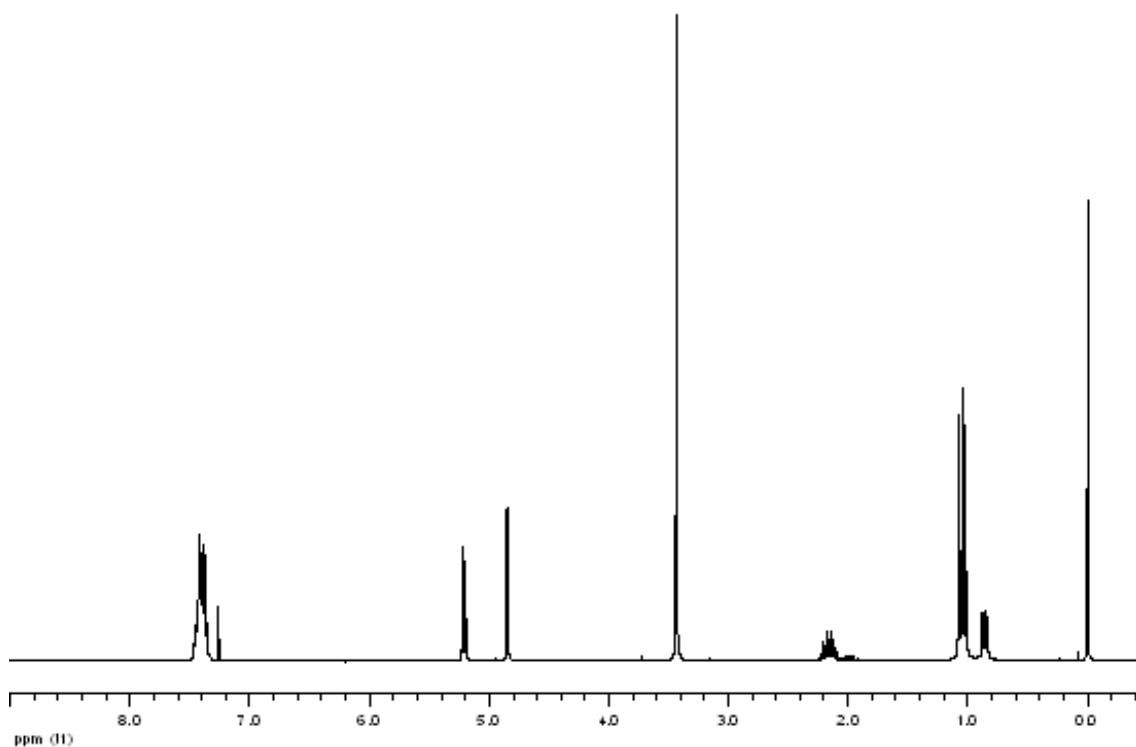

**Figure 1S.**  $^1\text{H}$ -NMR spectrum of (*R*)-MPA ester of compound **1** (250.13 MHz,  $\text{CDCl}_3$ , dr 85/15).

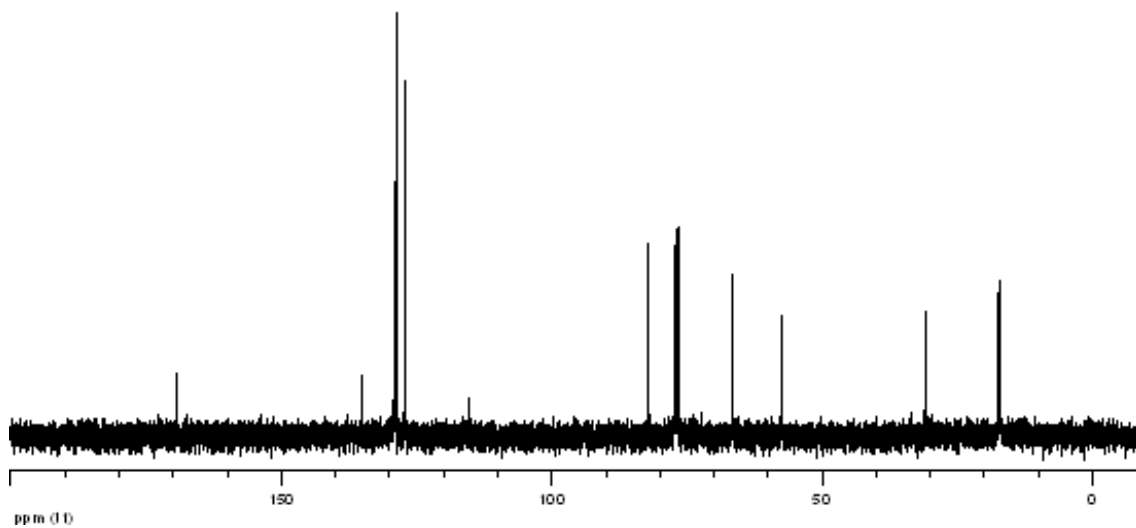

**Figure 2S.**  $^{13}\text{C}$ -NMR spectrum of (*R*)-MPA ester of compound **1** (75.46 MHz,  $\text{CDCl}_3$ , dr 85/15).

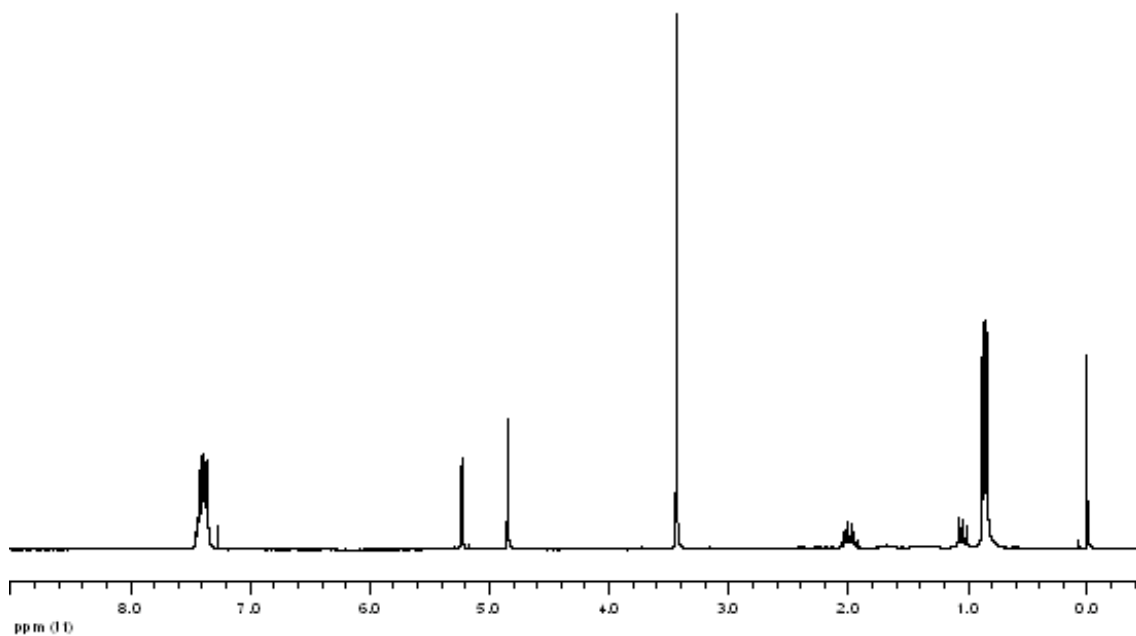

**Figure 3S.**  $^1\text{H}$ -NMR spectrum of (*S*)-MPA ester of compound **1** (250.13 MHz,  $\text{CDCl}_3$ , dr 88/12).

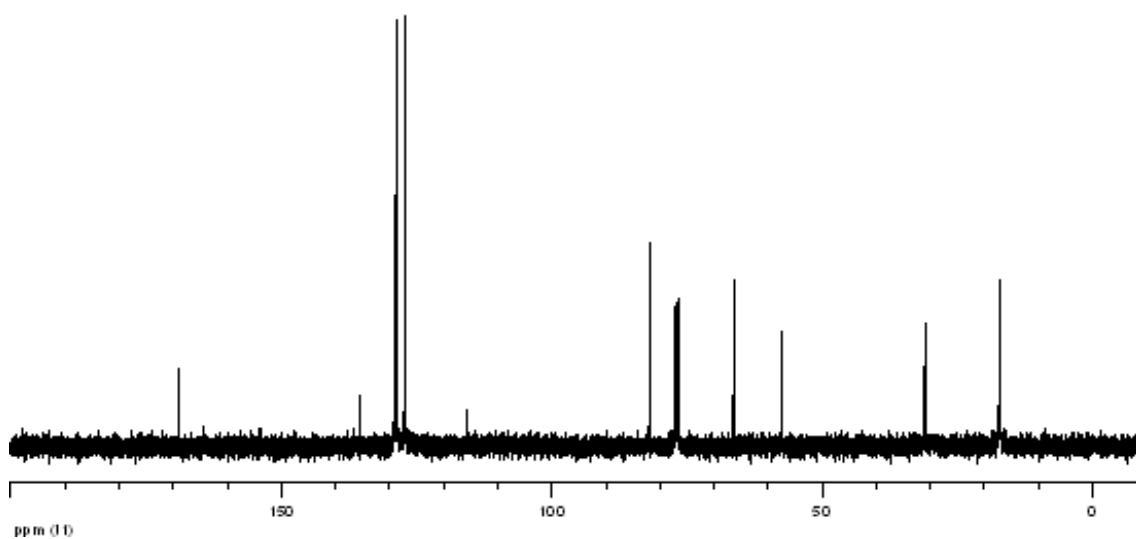

**Figure 4S.**  $^{13}\text{C}$ -NMR spectrum of (*S*)-MPA ester of compound **1** (75.46 MHz,  $\text{CDCl}_3$ , dr 88/12).

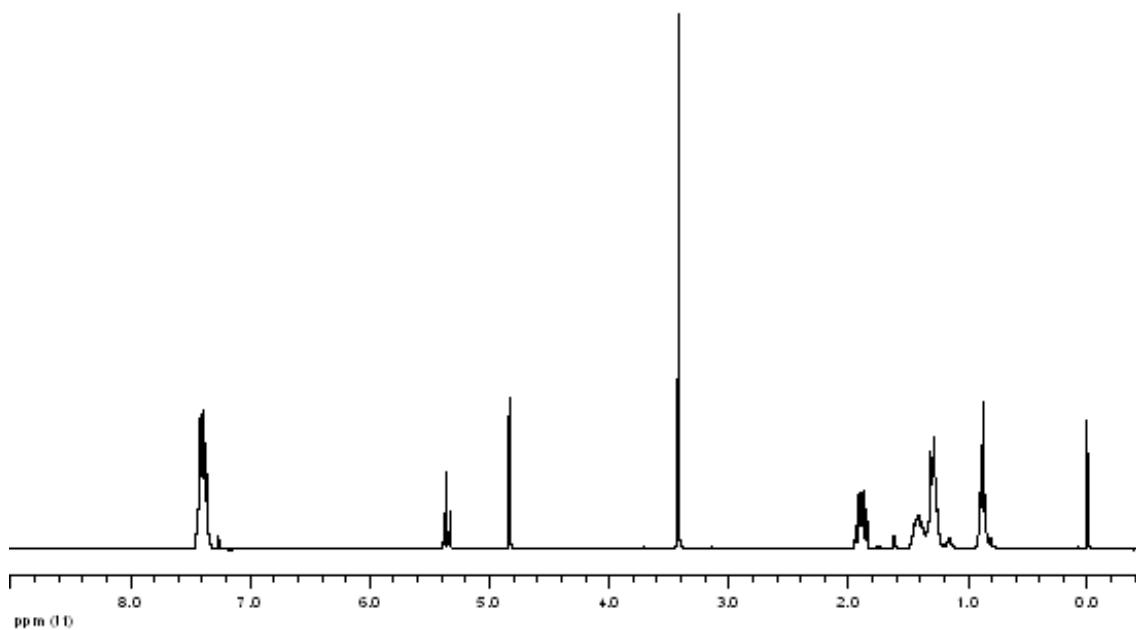

**Figure 5S.**  $^1\text{H}$ -NMR spectrum of (*R*)-MPA ester of compound **2** (250.13 MHz,  $\text{CDCl}_3$ ).

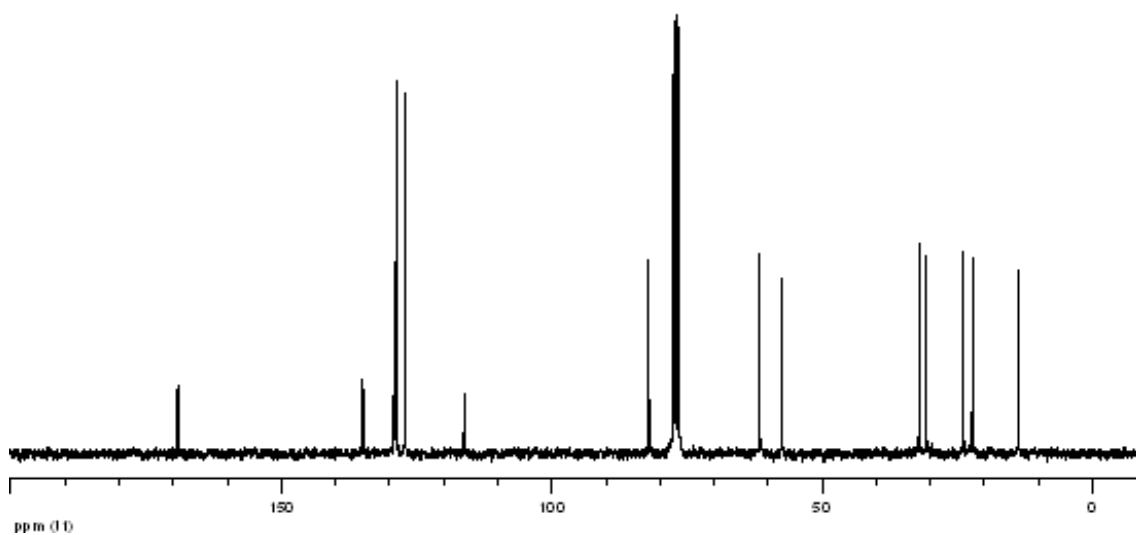

**Figure 6S.**  $^{13}\text{C}$ -NMR spectrum of (*R*)-MPA ester of compound **2** (62.90 MHz,  $\text{CDCl}_3$ ).

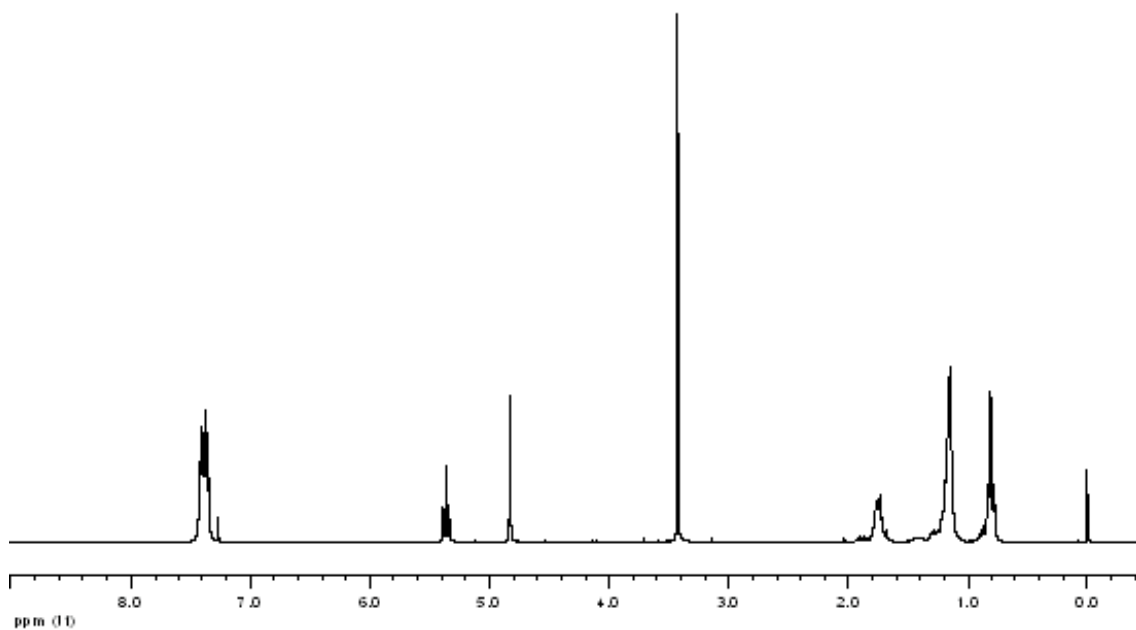

**Figure 7S.**  $^1\text{H}$ -NMR spectrum of (*S*)-MPA ester of compound **2** (250.13 MHz,  $\text{CDCl}_3$ ).

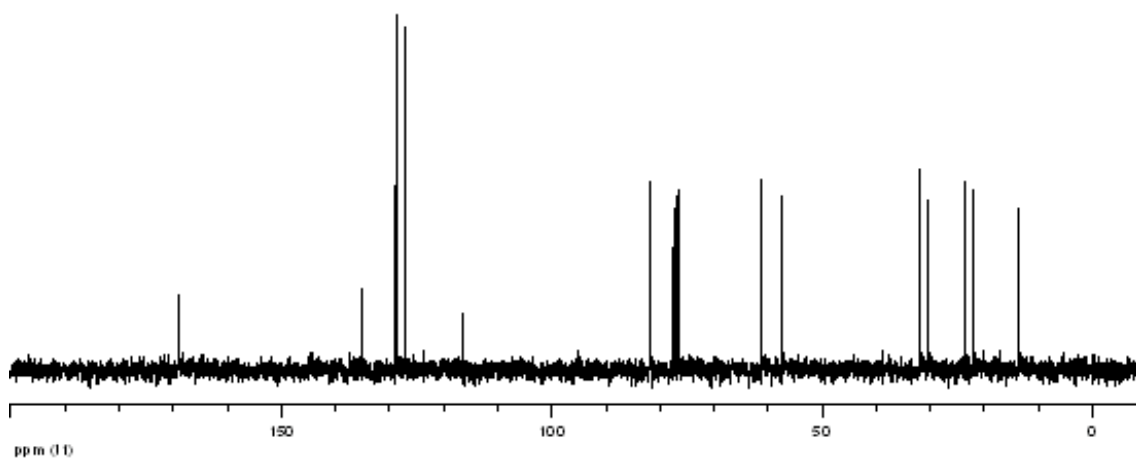

**Figure 8S.**  $^{13}\text{C}$ -NMR spectrum of (*S*)-MPA ester of compound **2** (62.90 MHz,  $\text{CDCl}_3$ ).

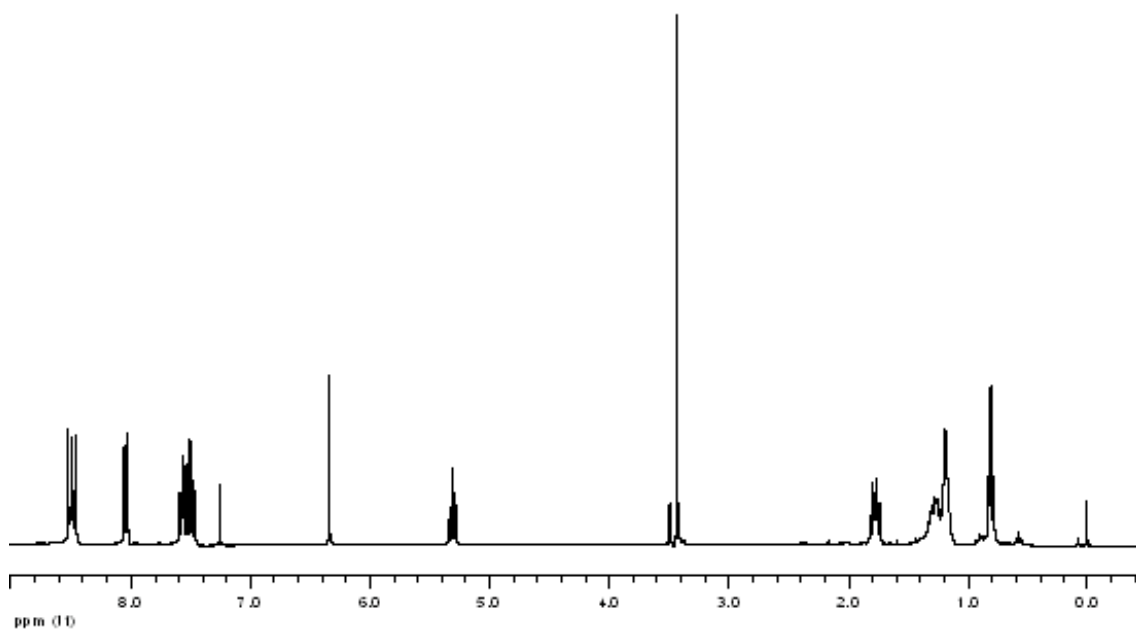

**Figure 9S.**  $^1\text{H}$ -NMR spectrum of (*R*)-9-AMA ester of compound **2** (300.07 MHz,  $\text{CDCl}_3$ ).

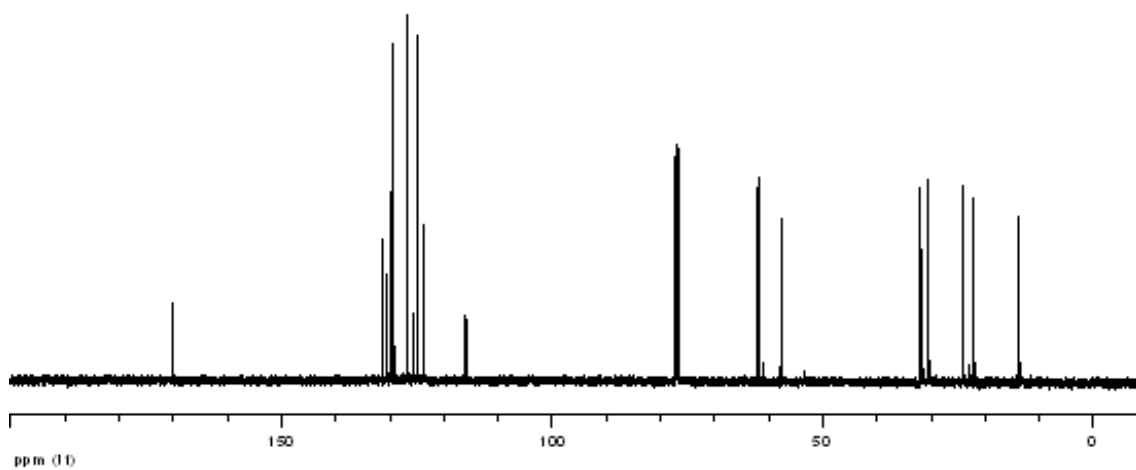

**Figure 10S.**  $^{13}\text{C}$ -NMR spectrum of (*R*)-9-AMA ester of compound **2** (100.58 MHz,  $\text{CDCl}_3$ ).

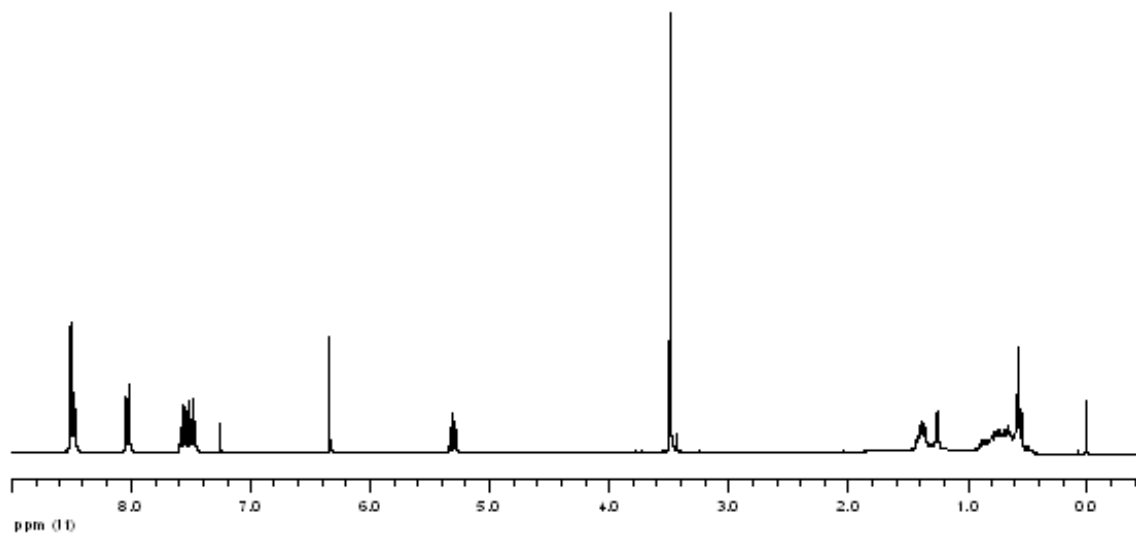

**Figure 11S.**  $^1\text{H}$ -NMR spectrum of (*S*)-9-AMA ester of compound **2** (300.07 MHz,  $\text{CDCl}_3$ ).

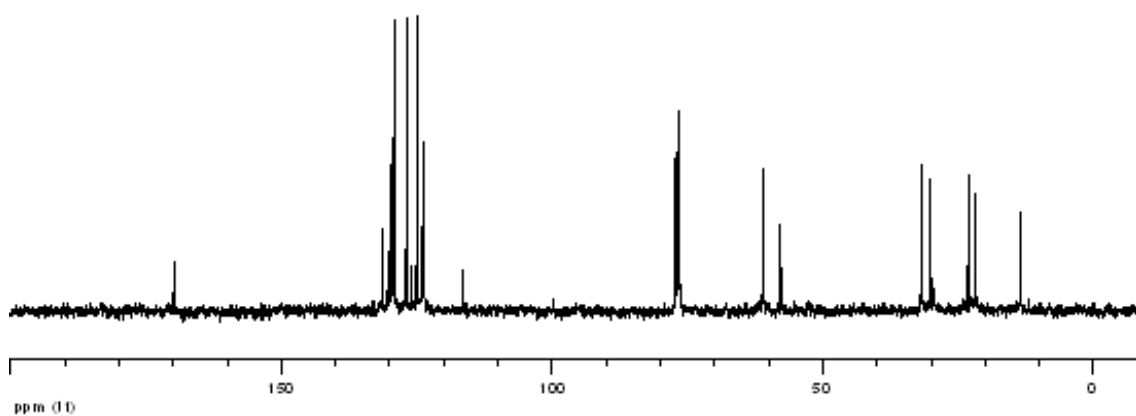

**Figure 12S.**  $^{13}\text{C}$ -NMR spectrum of (*S*)-9-AMA ester of compound **2** (75.46 MHz,  $\text{CDCl}_3$ ).

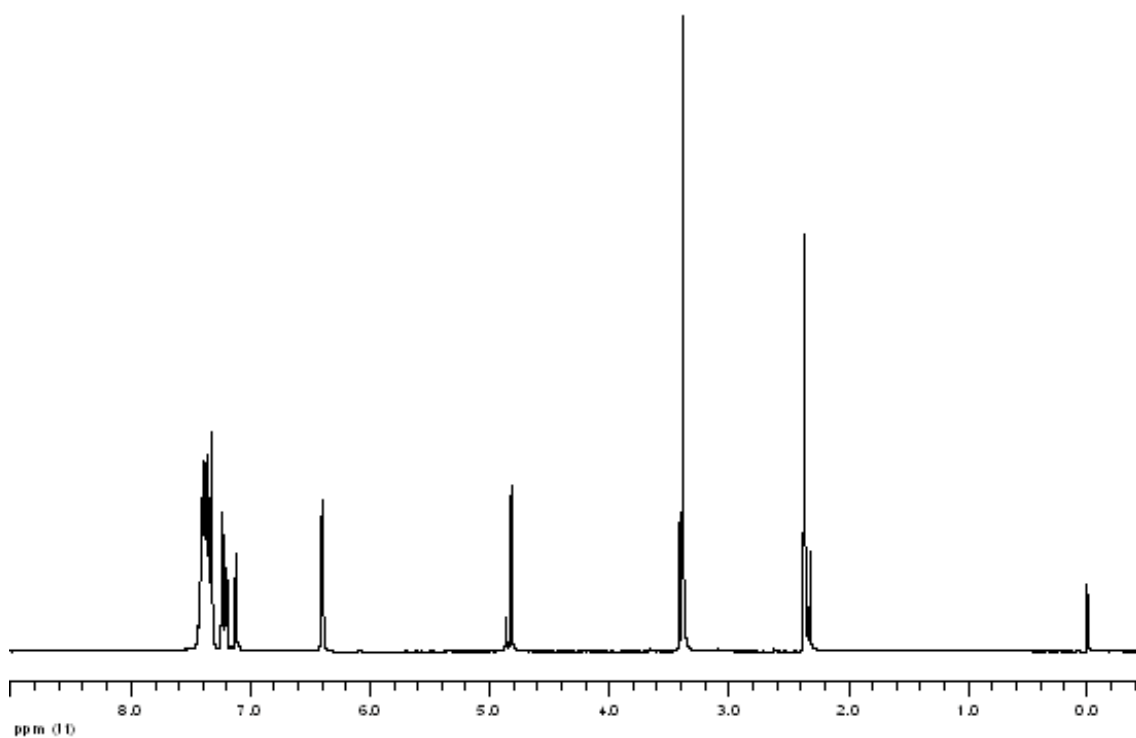

**Figure 13S.**  $^1\text{H}$ -NMR spectrum of (*R*)-MPA ester of compound **3** (250.13 MHz,  $\text{CDCl}_3$ , dr 84/16).

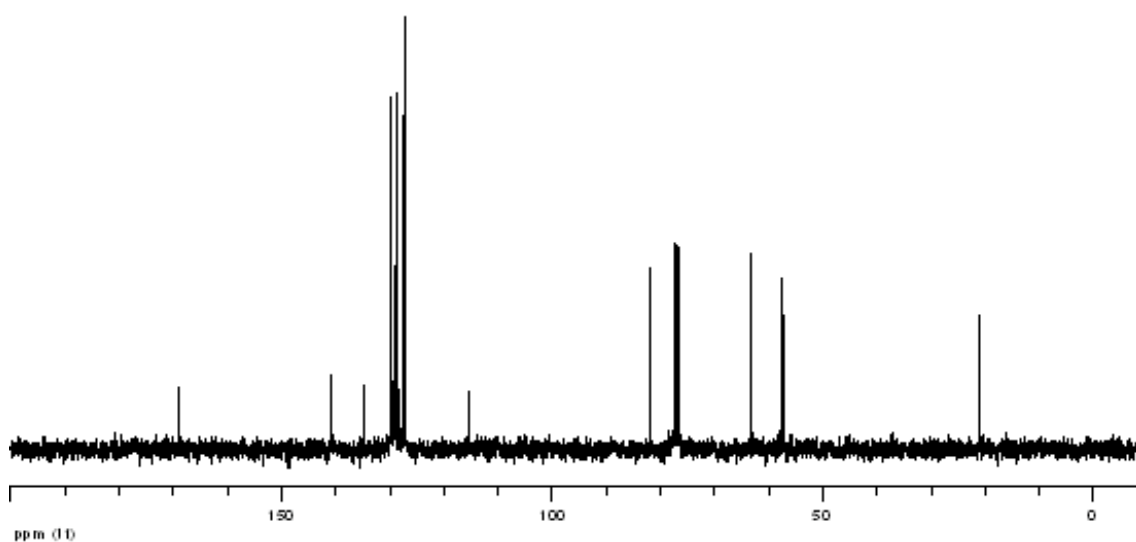

**Figure 14S.**  $^{13}\text{C}$ -NMR spectrum of (*R*)-MPA ester of compound **3** (62.90 MHz,  $\text{CDCl}_3$ , dr 84/16).



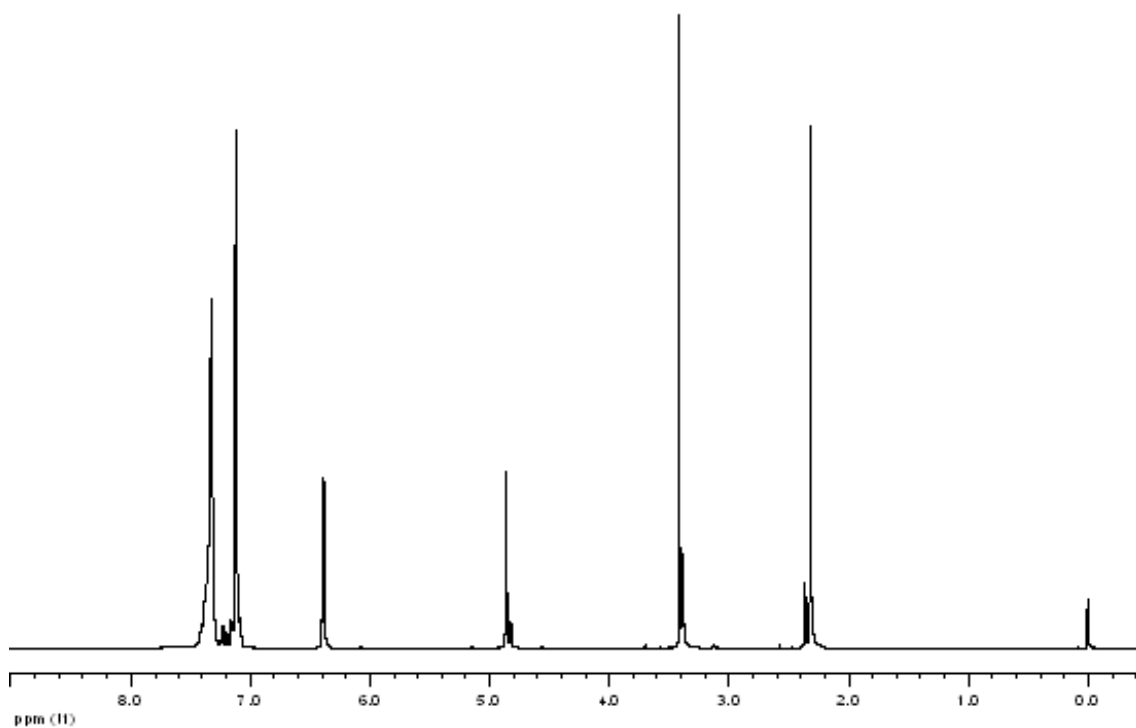

**Figure 15S.**  $^1\text{H}$ -NMR spectrum of (*S*)-MPA ester of compound **3** (250.13 MHz,  $\text{CDCl}_3$ , dr 89/11).

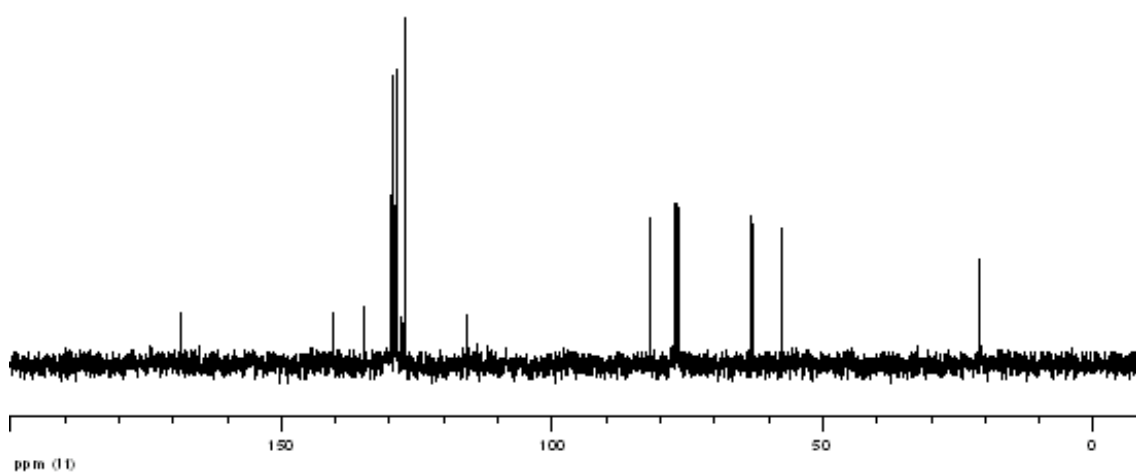

**Figure 16S.**  $^{13}\text{C}$ -NMR spectrum of (*S*)-MPA ester of compound **3** (62.90 MHz,  $\text{CDCl}_3$ , dr 89/11).

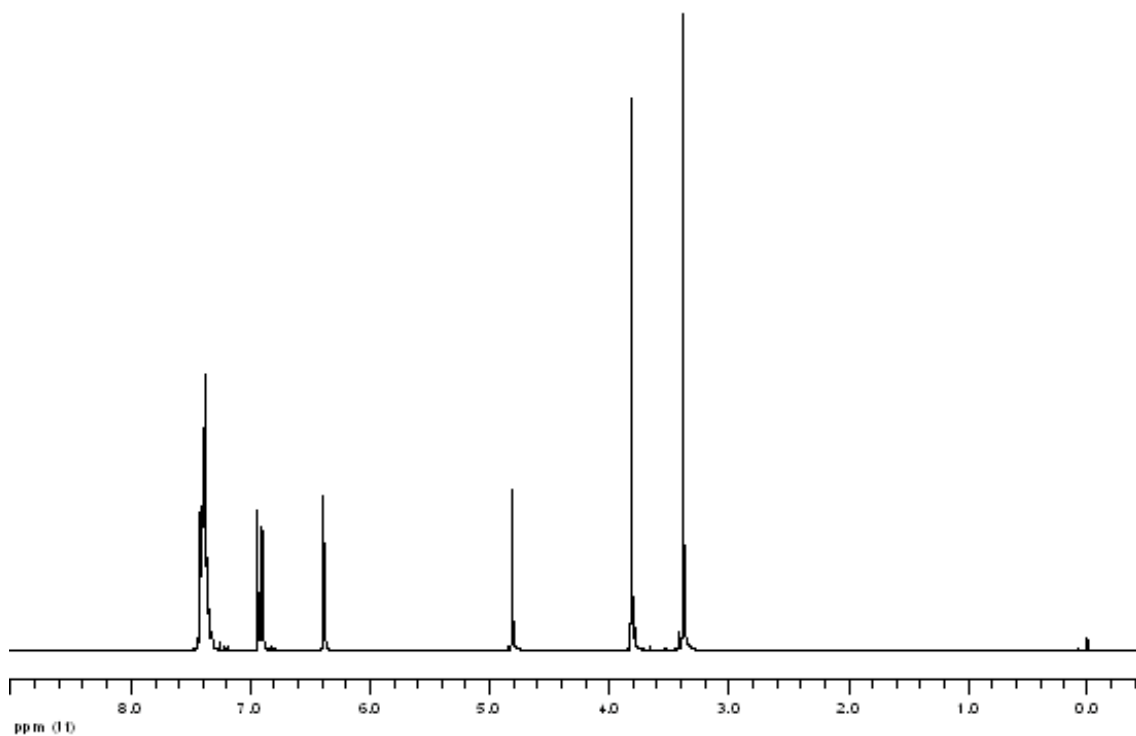

**Figure 17S.** <sup>1</sup>H-NMR spectrum of (*R*)-MPA ester of compound **4** (250.13 MHz, CDCl<sub>3</sub>).

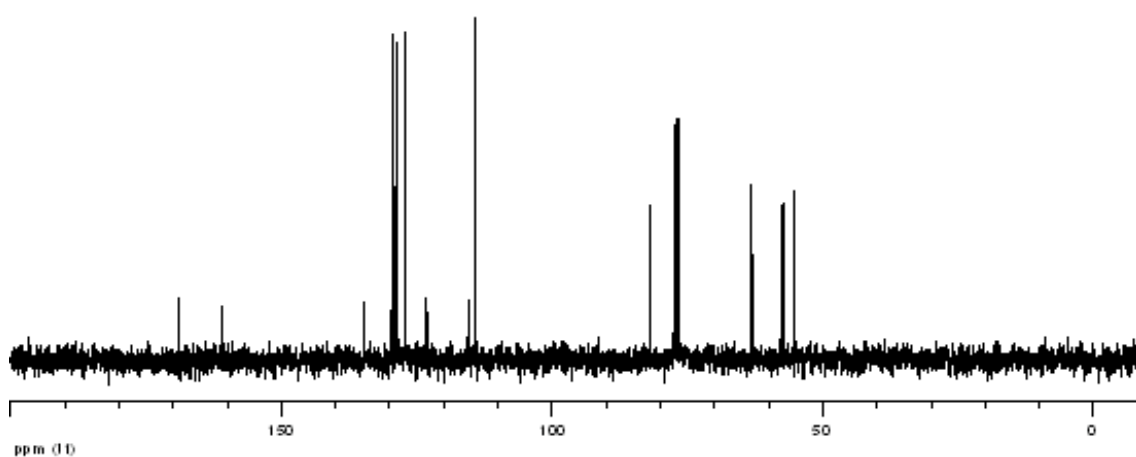

**Figure 18S.** <sup>13</sup>C-NMR spectrum of (*R*)-MPA ester of compound **4** (62.90 MHz, CDCl<sub>3</sub>).

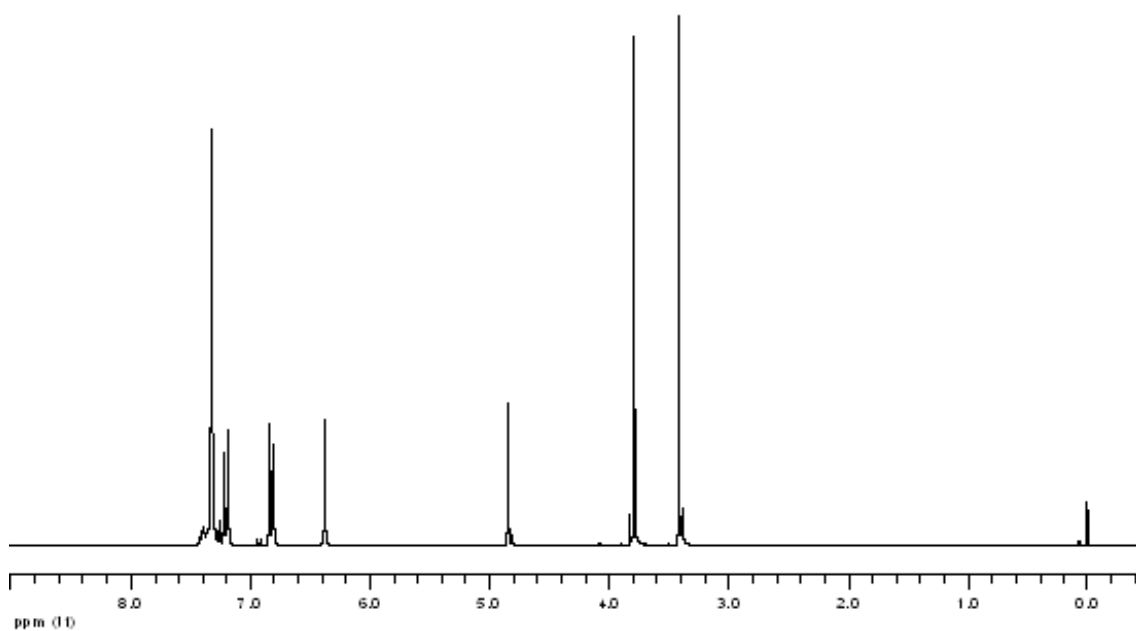

**Figure 19S.**  $^1\text{H}$ -NMR spectrum of (*S*)-MPA ester of compound **4** (250.13 MHz,  $\text{CDCl}_3$ ).

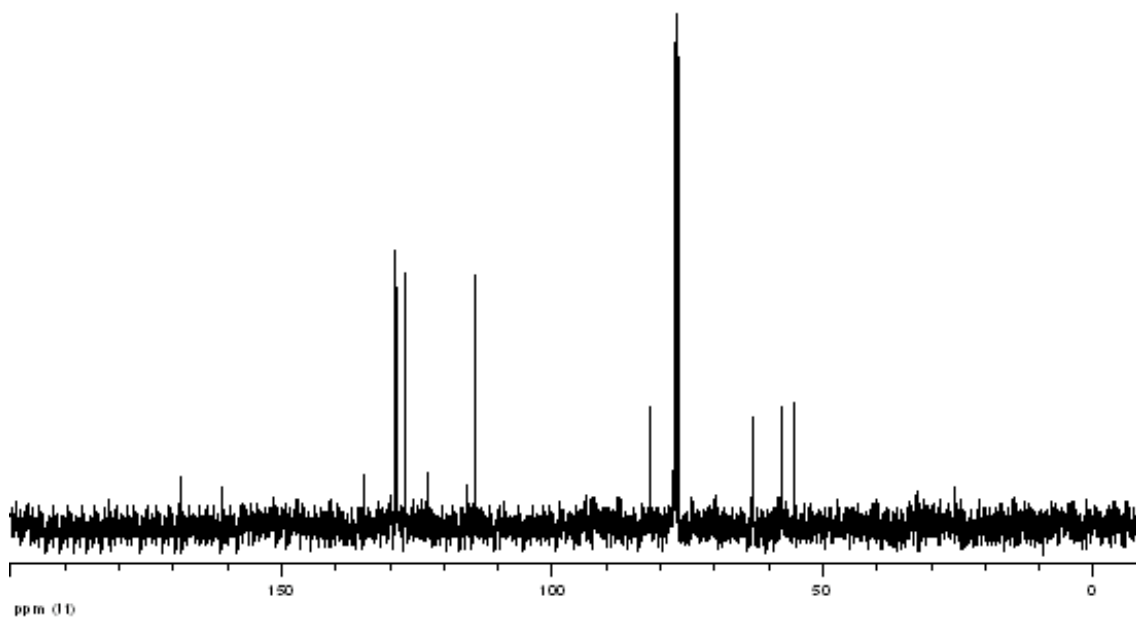

**Figure 20S.**  $^{13}\text{C}$ -NMR spectrum of (*S*)-MPA ester of compound **4** (62.90 MHz,  $\text{CDCl}_3$ ).

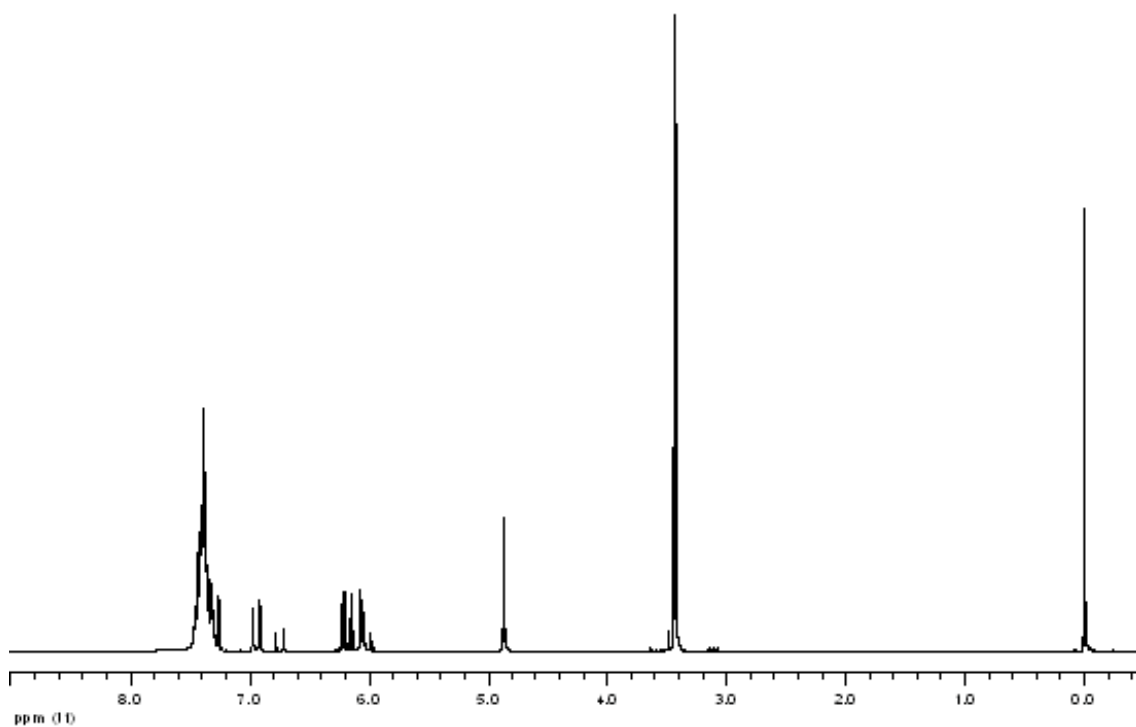

**Figure 21S.**  $^1\text{H}$ -NMR spectrum of (*R*)-MPA ester of compound **5** (250.13 MHz,  $\text{CDCl}_3$ , dr 81/19).

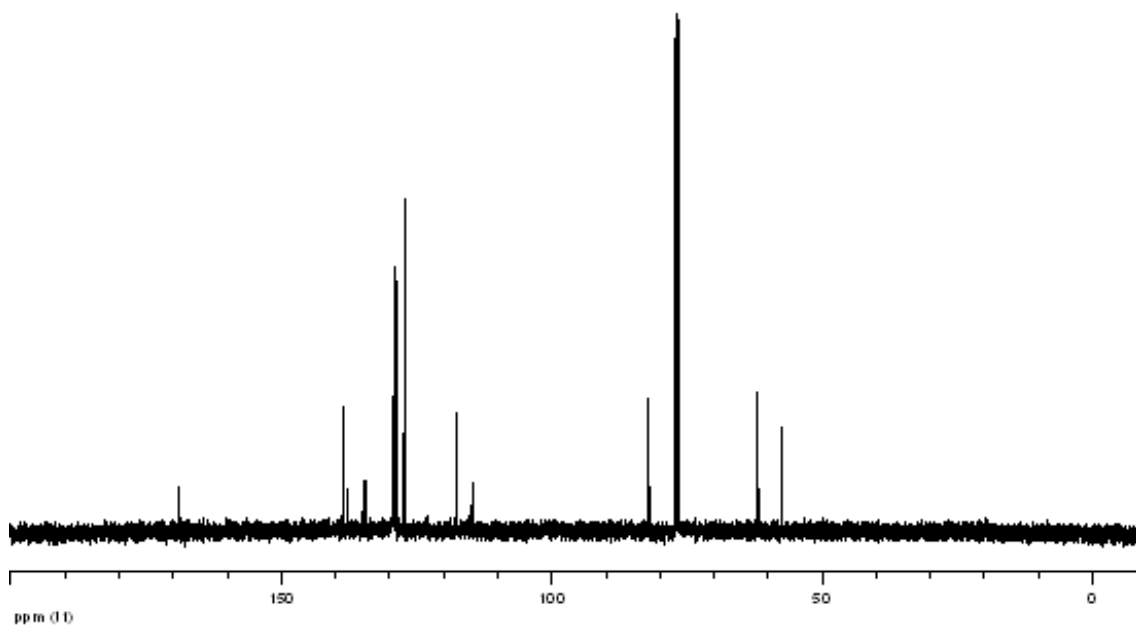

**Figure 22S.**  $^{13}\text{C}$ -NMR spectrum of (*R*)-MPA ester of compound **5** (100.58 MHz,  $\text{CDCl}_3$ , dr 81/19).

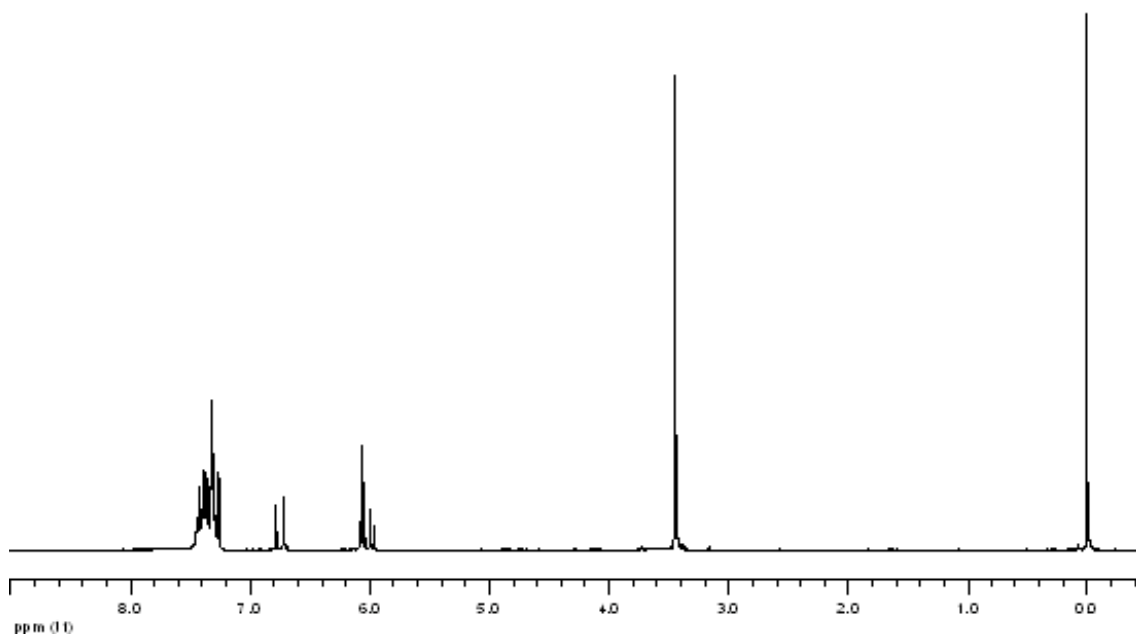

**Figure 23S.**  $^1\text{H}$ -NMR spectrum of (*S*)-MPA ester of compound **5** (250.13 MHz,  $\text{CDCl}_3$ ).

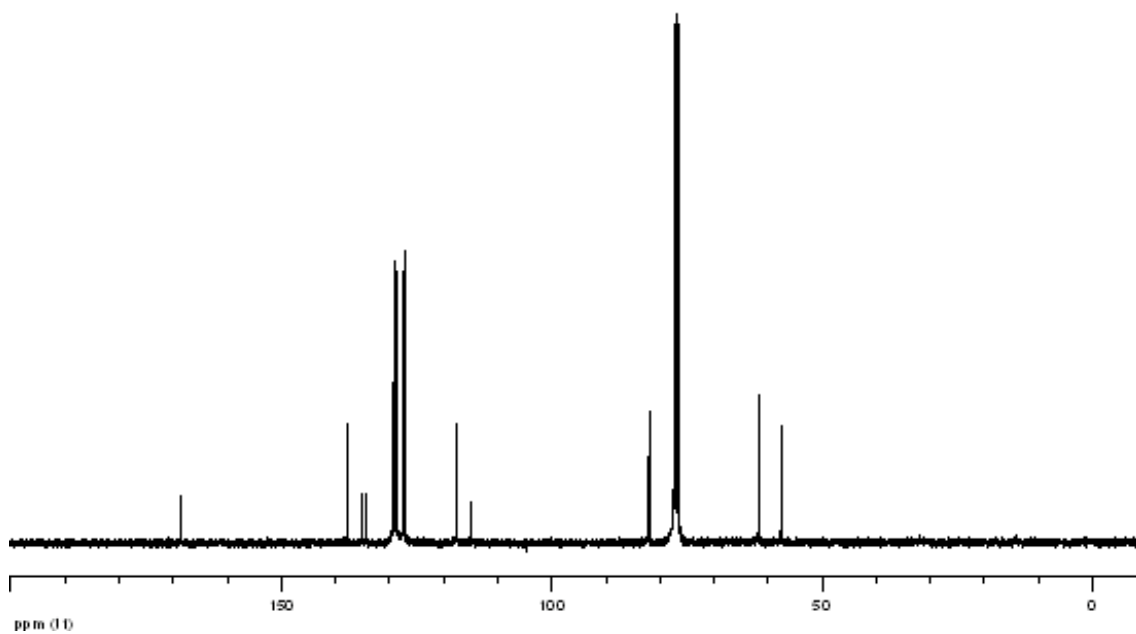

**Figure 24S.**  $^{13}\text{C}$ -NMR spectrum of (*S*)-MPA ester of compound **5** (75.46 MHz,  $\text{CDCl}_3$ ).

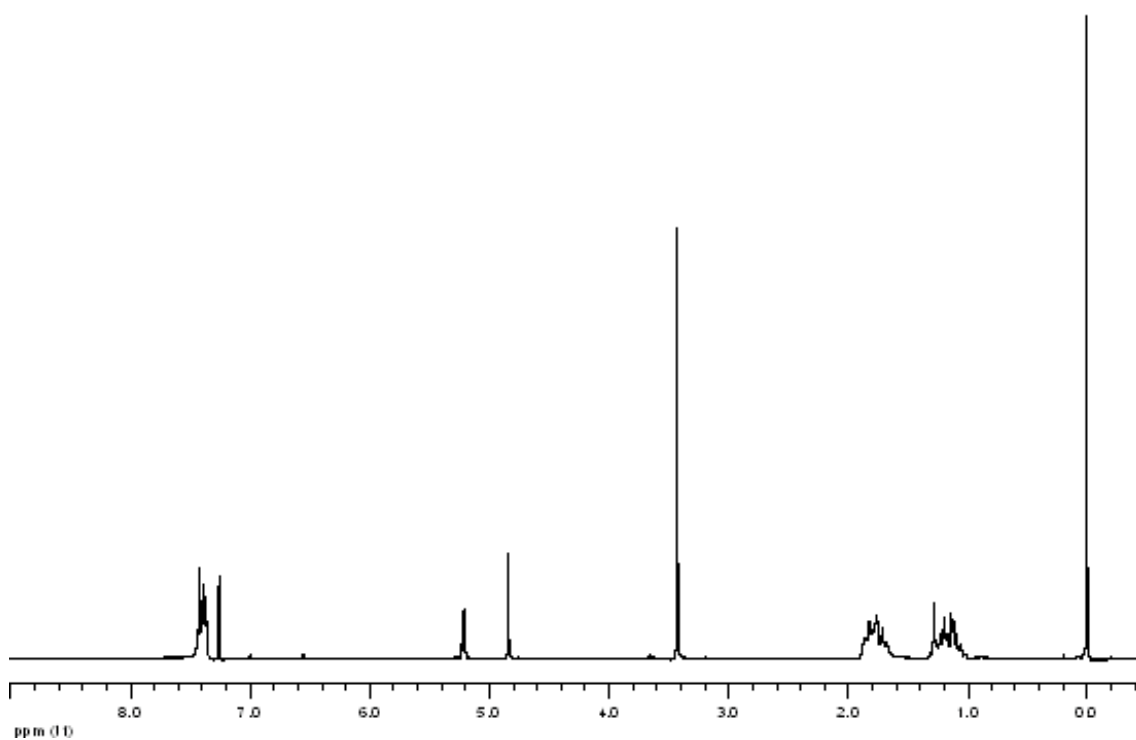

**Figure 25S.**  $^1\text{H}$ -NMR spectrum of (*R*)-MPA ester of compound **6** (300.07 MHz,  $\text{CDCl}_3$ ).

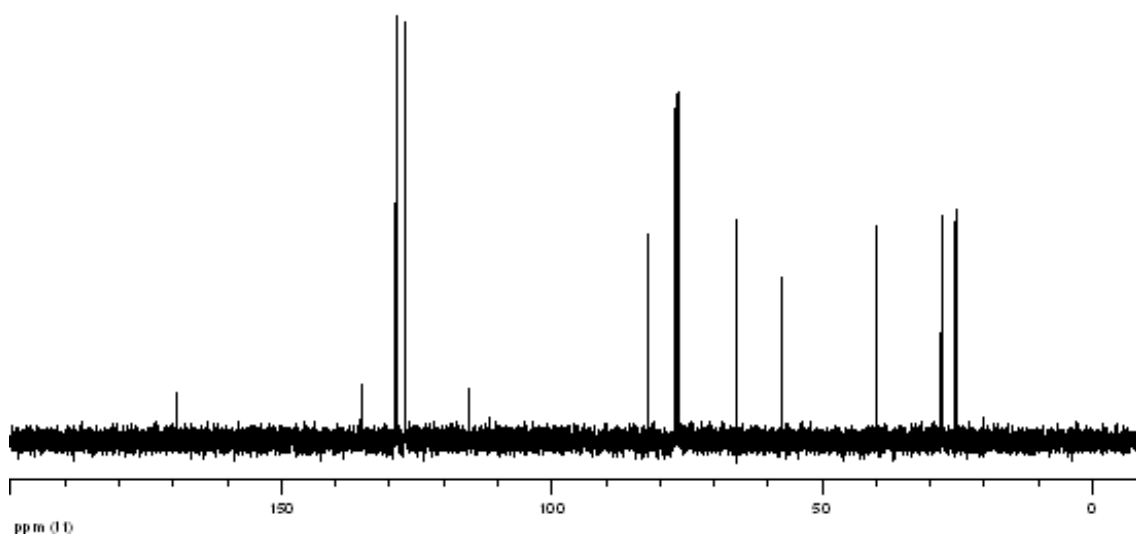

**Figure 26S.**  $^{13}\text{C}$ -NMR spectrum of (*R*)-MPA ester of compound **6** (75.46 MHz,  $\text{CDCl}_3$ ).

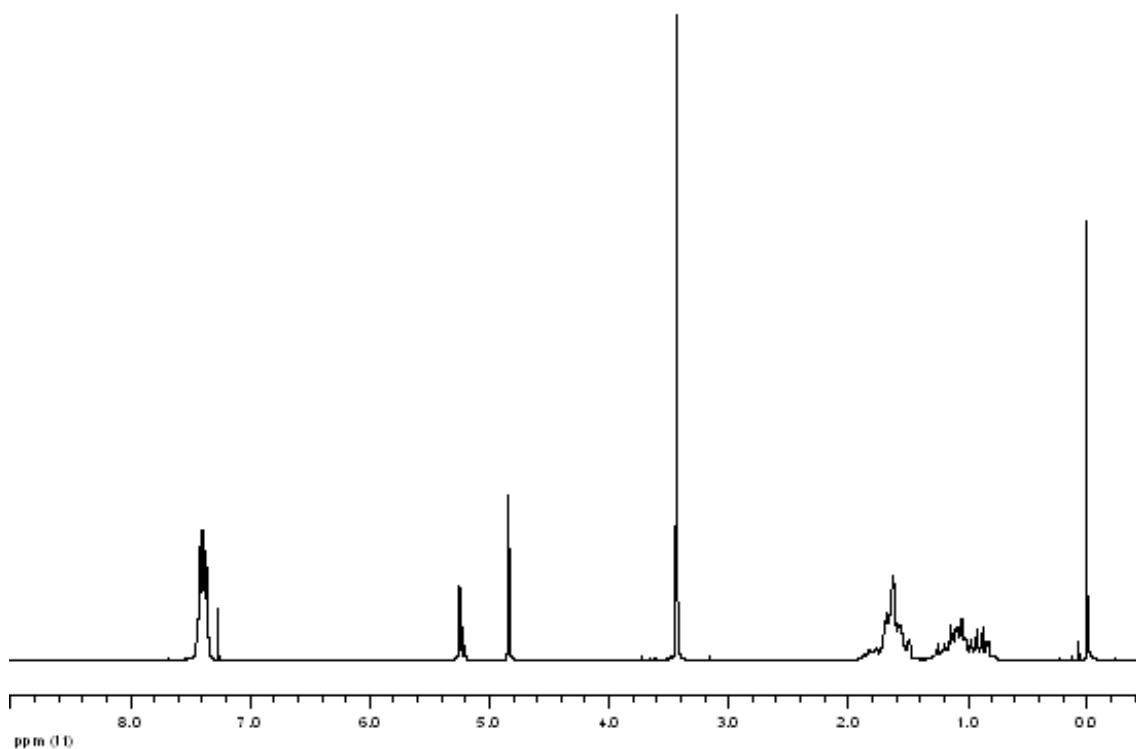

**Figure 27S.**  $^1\text{H}$ -NMR spectrum of (*S*)-MPA ester of compound **6** (250.13 MHz,  $\text{CDCl}_3$ , dr 85/15).

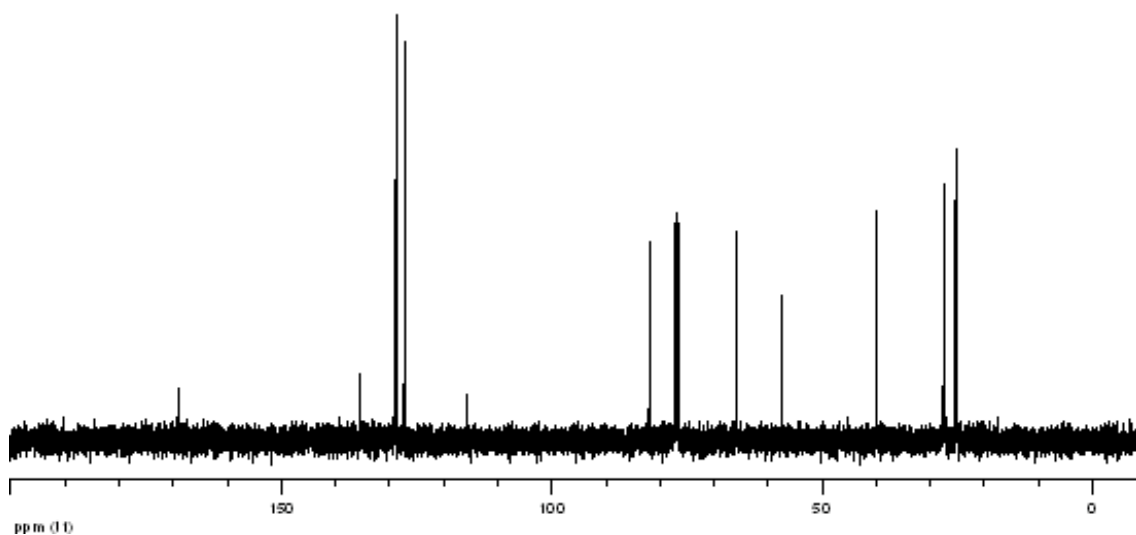

**Figure 28S.**  $^{13}\text{C}$ -NMR spectrum of (*S*)-MPA ester of compound **6** (75.46 MHz,  $\text{CDCl}_3$ , dr 85/15).

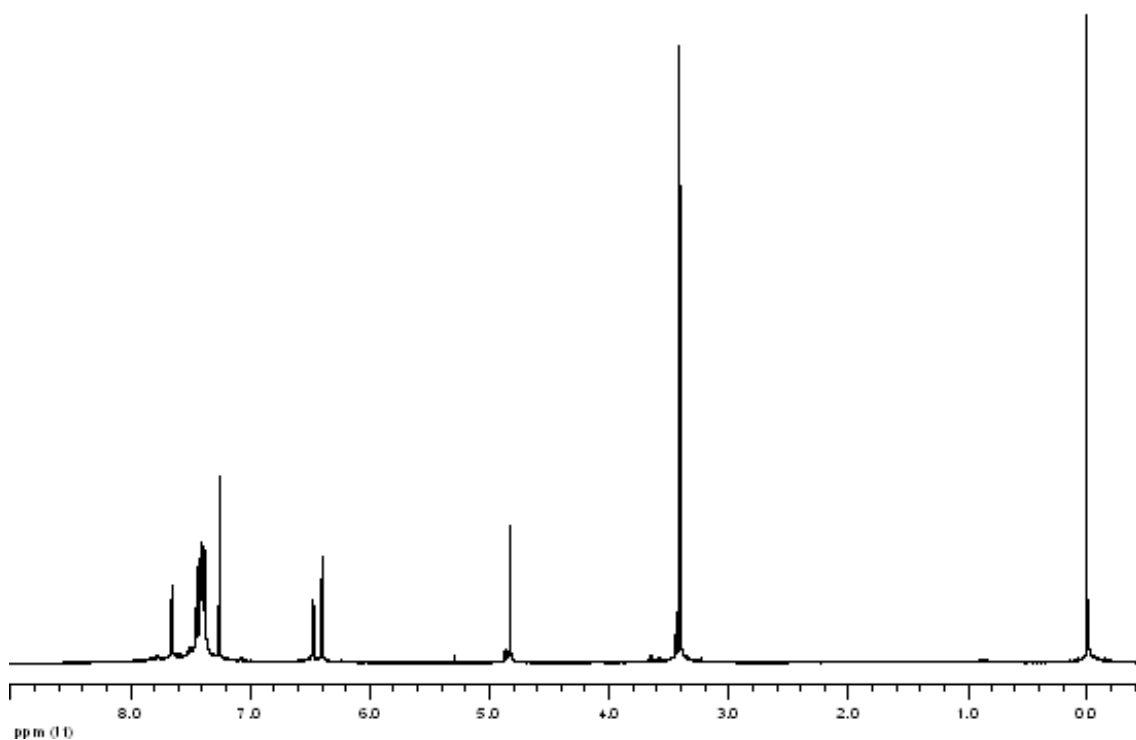

**Figure 29S.**  $^1\text{H}$ -NMR spectrum of (*R*)-MPA ester of compound **7** (399.97 MHz,  $\text{CDCl}_3$ ).

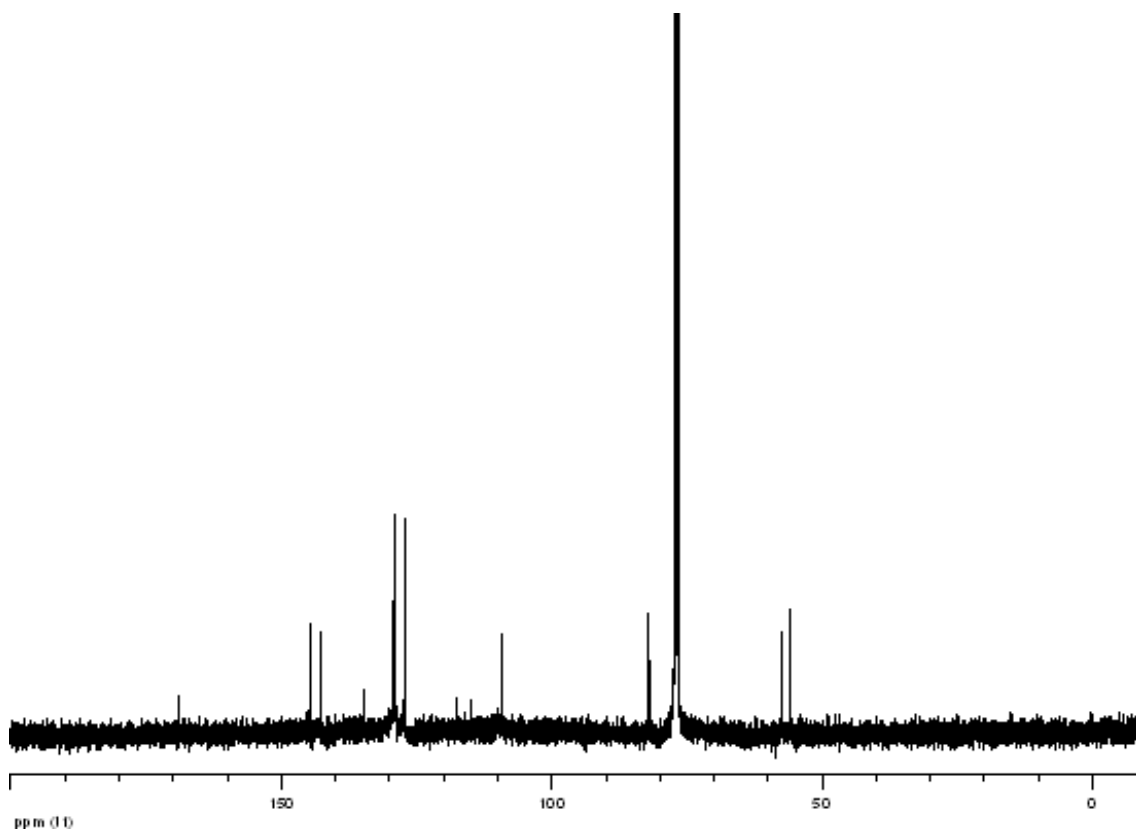

**Figure 30S.**  $^{13}\text{C}$ -NMR spectrum of (*R*)-MPA ester of compound **7** (100.58 MHz,  $\text{CDCl}_3$ ).



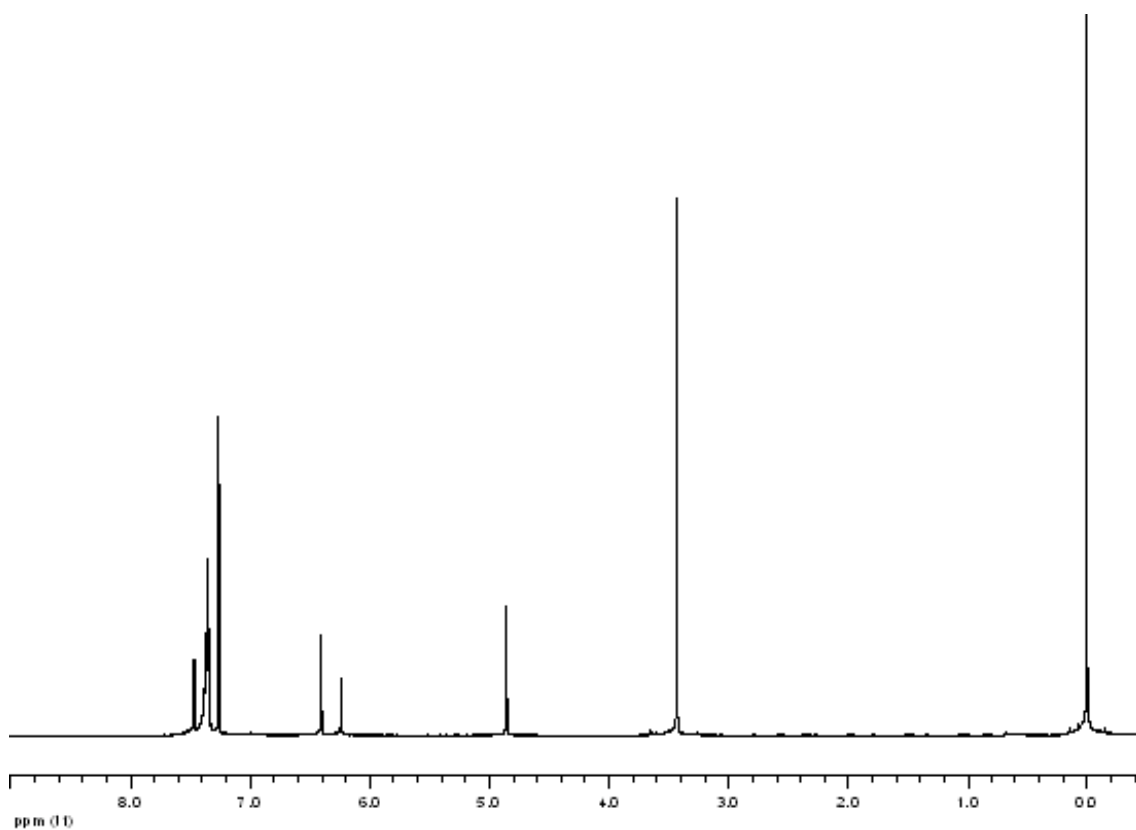

**Figure 31S.**  $^1\text{H}$ -NMR spectrum of (*S*)-MPA ester of compound **7** (399.97 MHz,  $\text{CDCl}_3$ ).

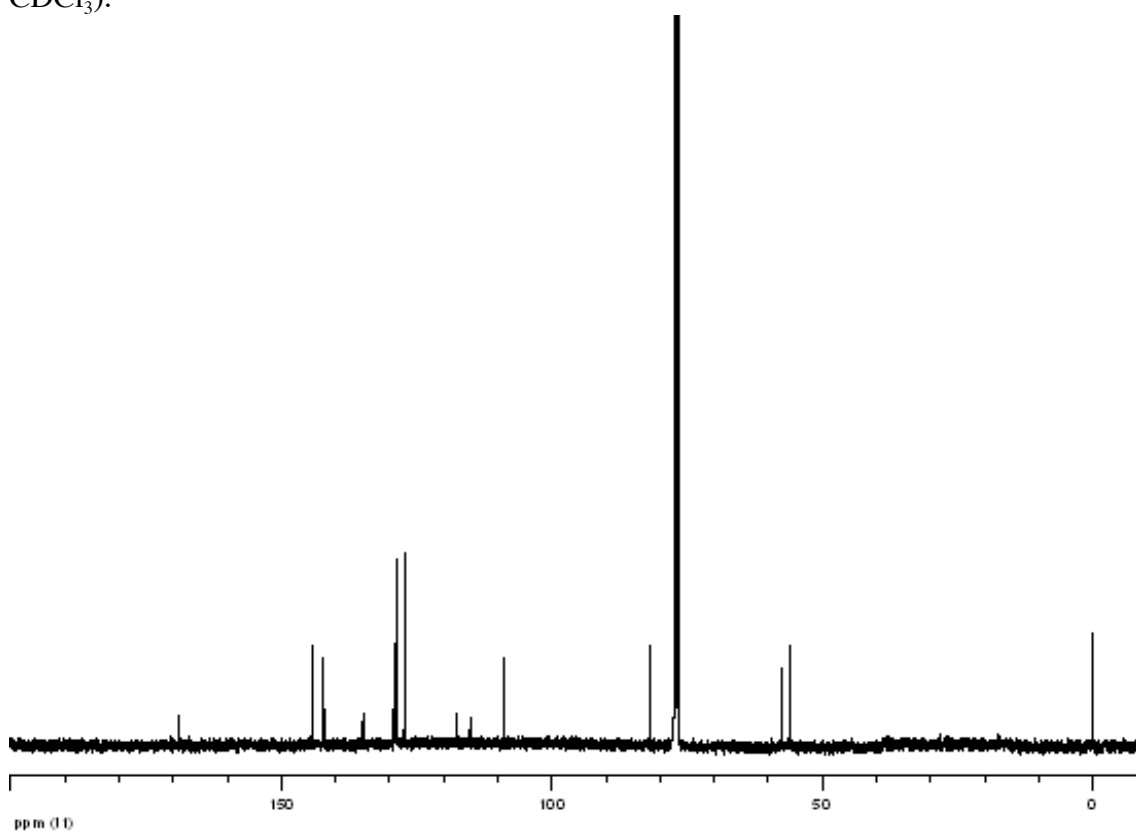

**Figure 32S.**  $^{13}\text{C}$ -NMR spectrum of (*S*)-MPA ester of compound **7** (100.58 MHz,  $\text{CDCl}_3$ ).

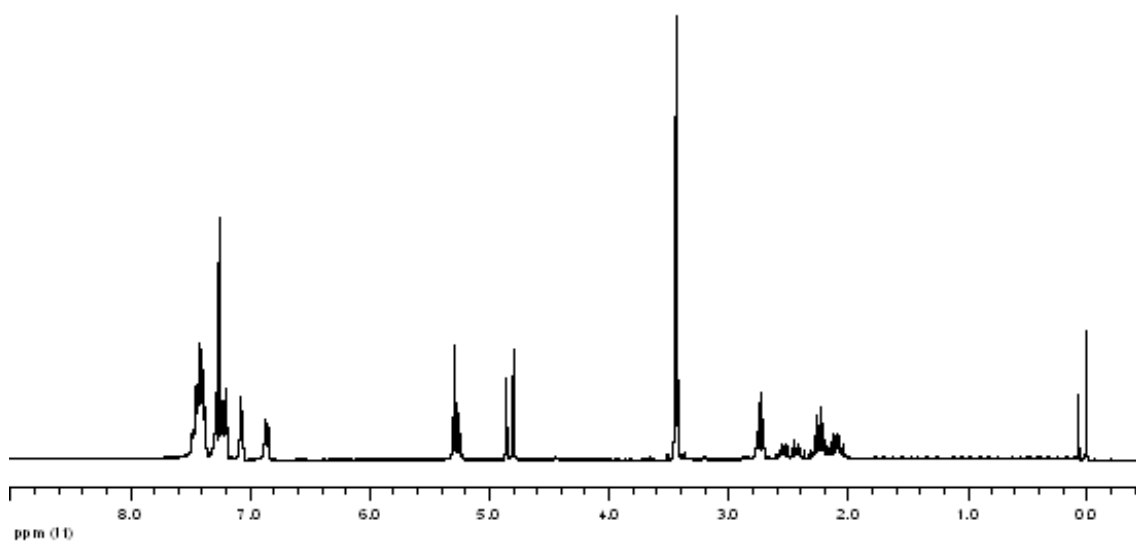

**Figure 33S.**  $^1\text{H}$ -NMR spectrum of (*R*)-MPA ester of compound **8** (250.13 MHz,  $\text{CDCl}_3$ , dr 57/43).

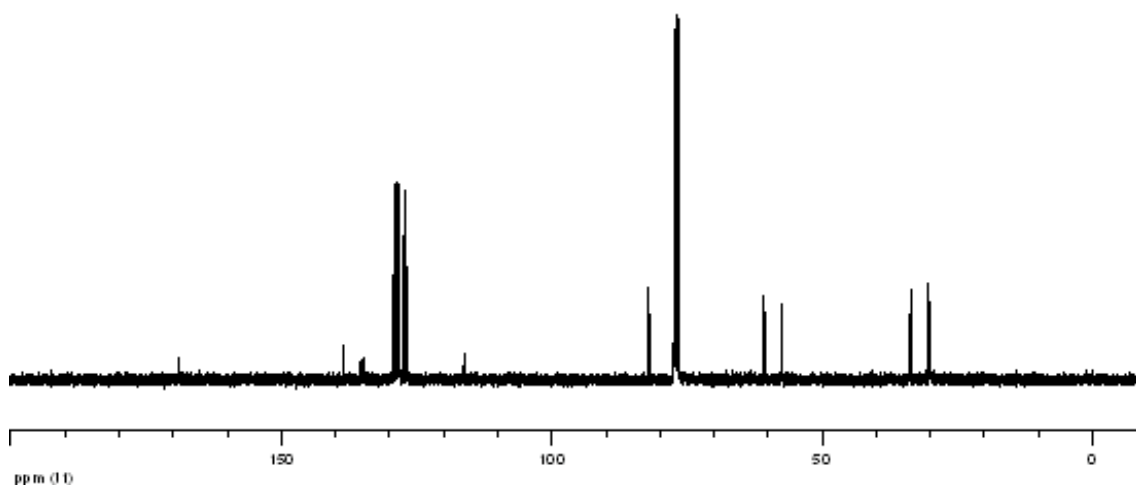

**Figure 34S.**  $^{13}\text{C}$ -NMR spectrum of (*R*)-MPA ester of compound **8** (75.46 MHz,  $\text{CDCl}_3$ , dr 57/43).

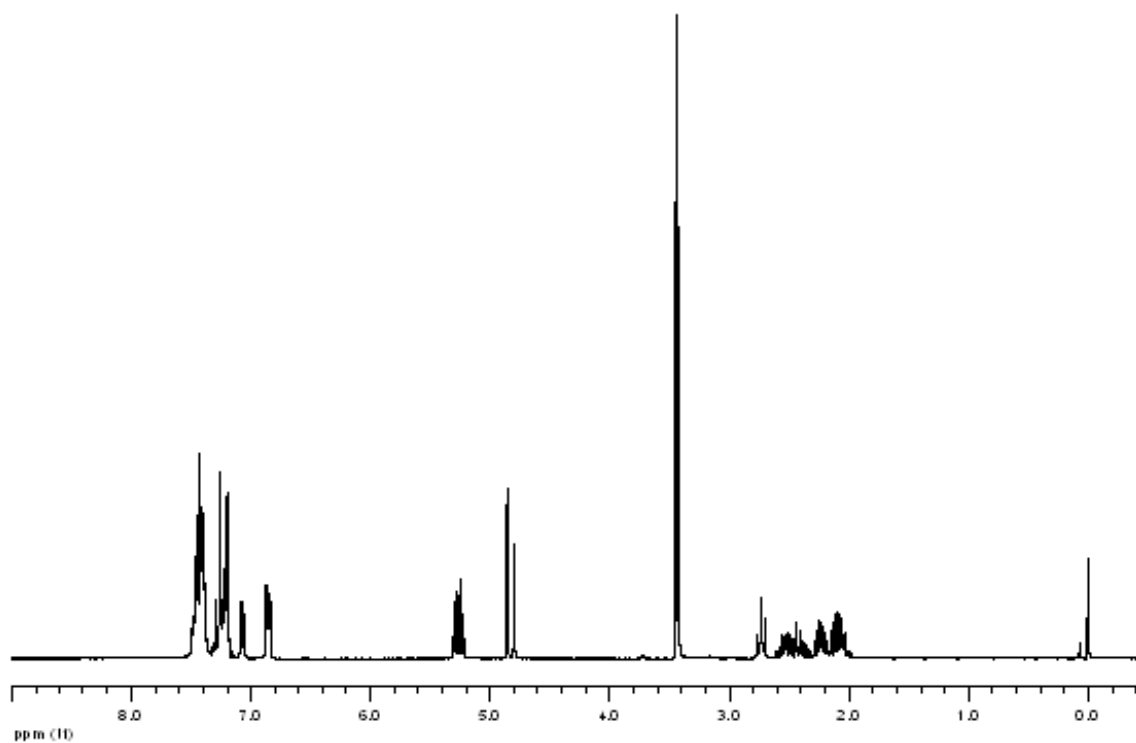

**Figure 35S.**  $^1\text{H}$ -NMR spectrum of (*S*)-MPA ester of compound **8** (250.13 MHz,  $\text{CDCl}_3$ , dr 61/39).

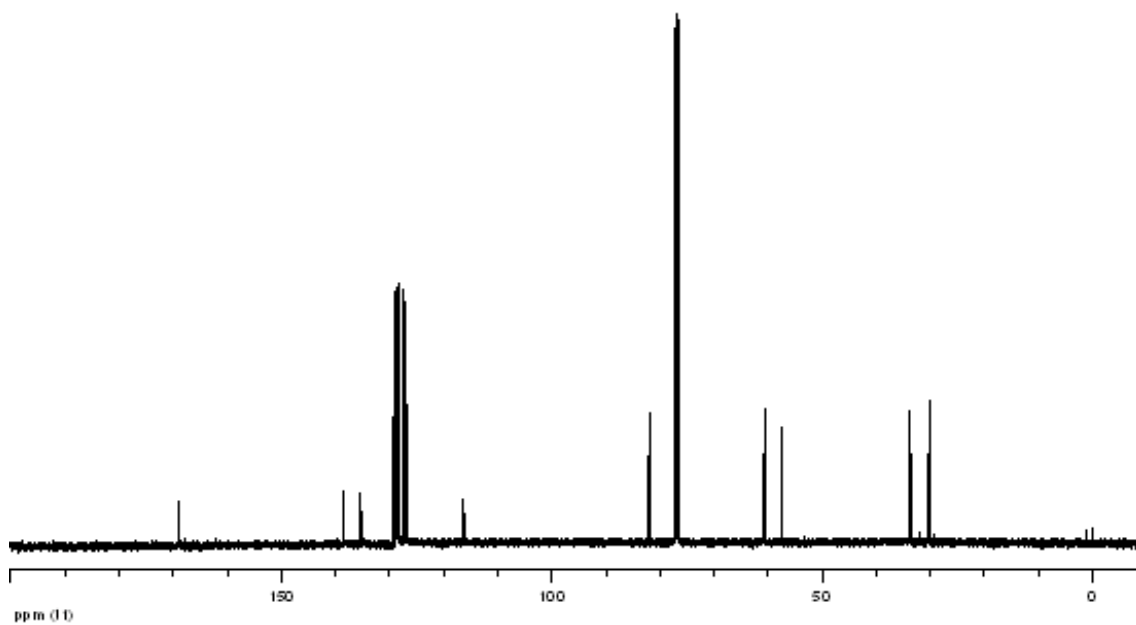

**Figure 36S.**  $^{13}\text{C}$ -NMR spectrum of (*S*)-MPA ester of compound **8** (100.58 MHz,  $\text{CDCl}_3$ , dr 61/39).

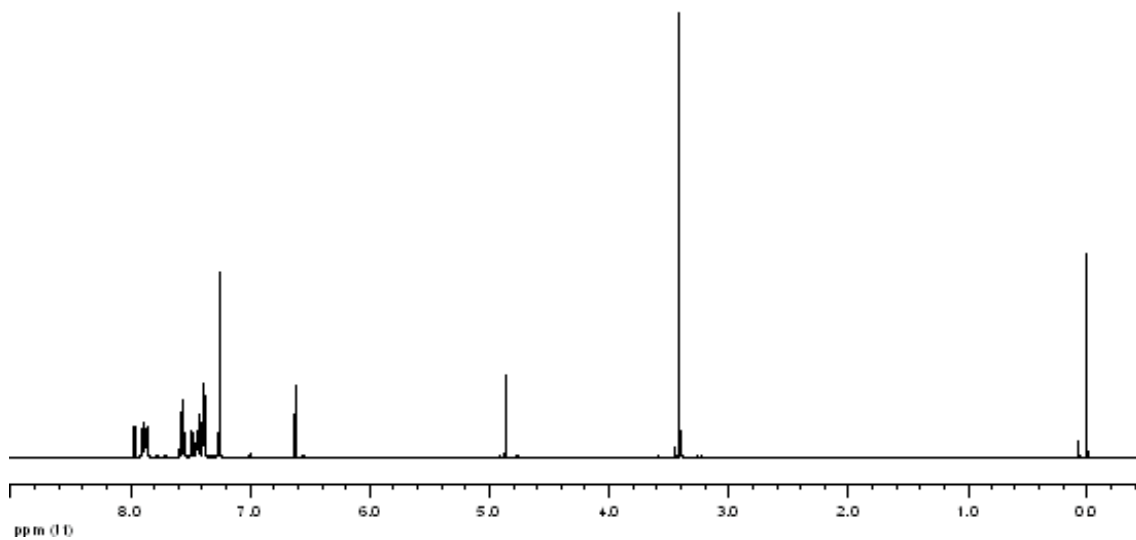

**Figure 37S.**  $^1\text{H}$ -NMR spectrum of (*R*)-MPA ester of compound **9** (399.97 MHz,  $\text{CDCl}_3$ ).

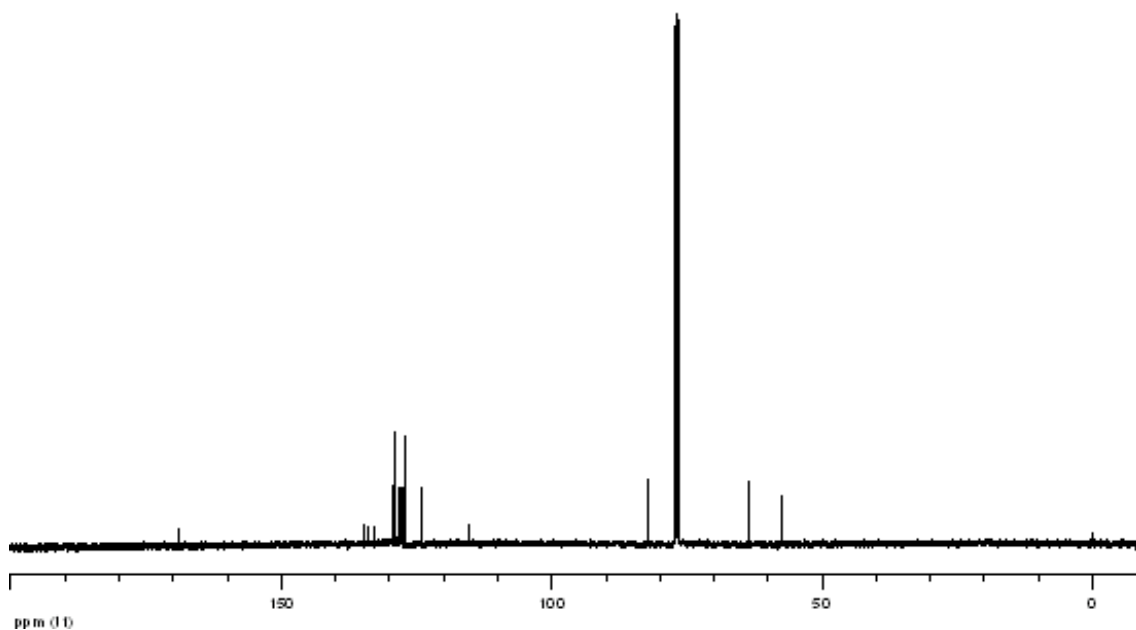

**Figure 38S.**  $^{13}\text{C}$ -NMR spectrum of (*R*)-MPA ester of compound **9** (100.58 MHz,  $\text{CDCl}_3$ ).

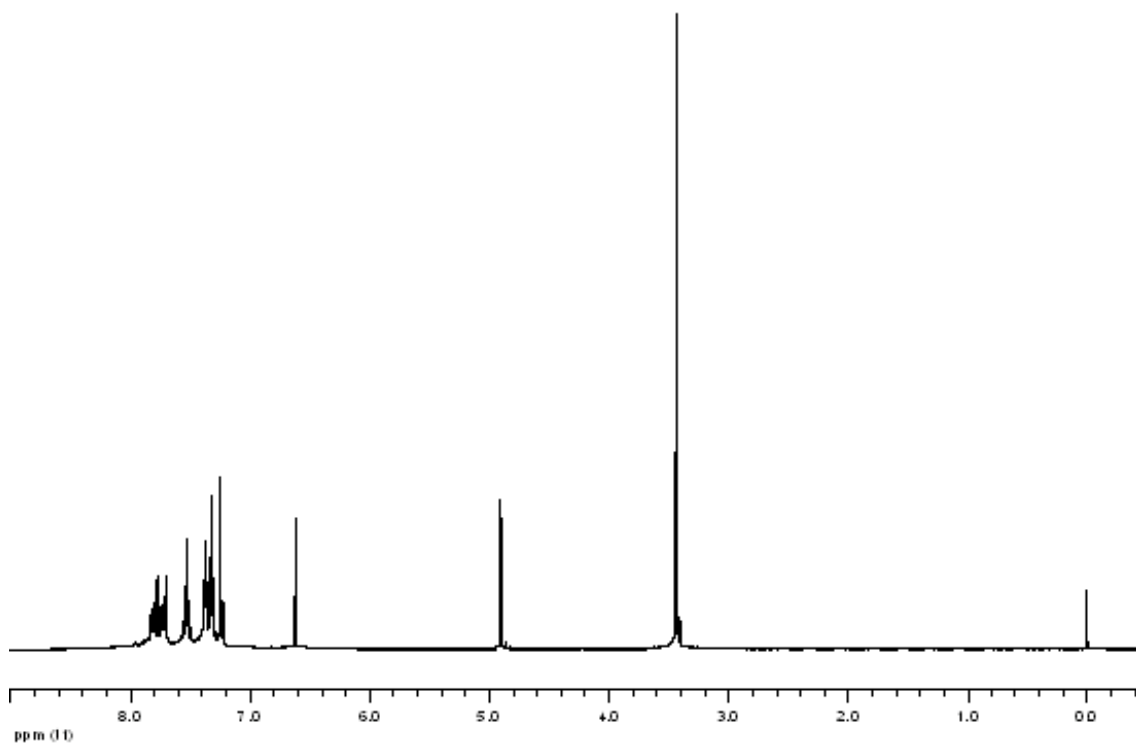

**Figure 39S.** <sup>1</sup>H-NMR spectrum of (*S*)-MPA ester of compound **9** (399.97 MHz, CDCl<sub>3</sub>).

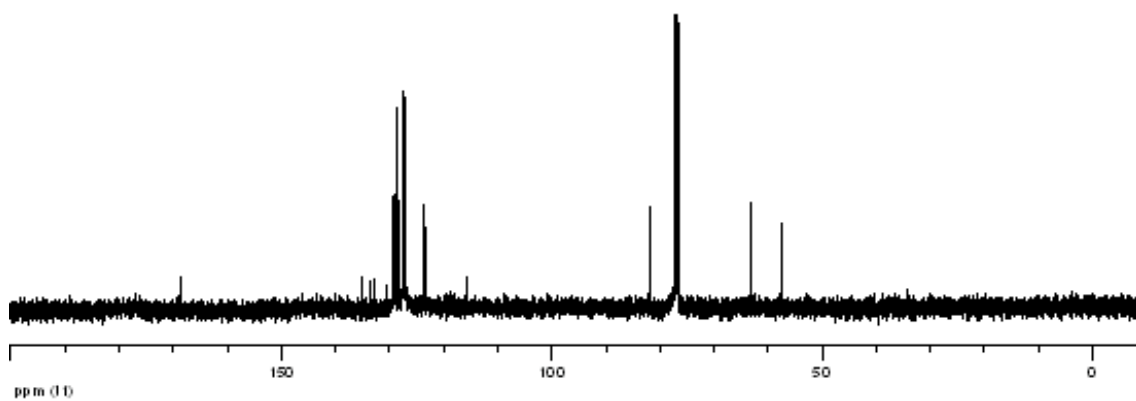

**Figure 40S.** <sup>13</sup>C-NMR spectrum of (*S*)-MPA ester of compound **9** (100.58 MHz, CDCl<sub>3</sub>).

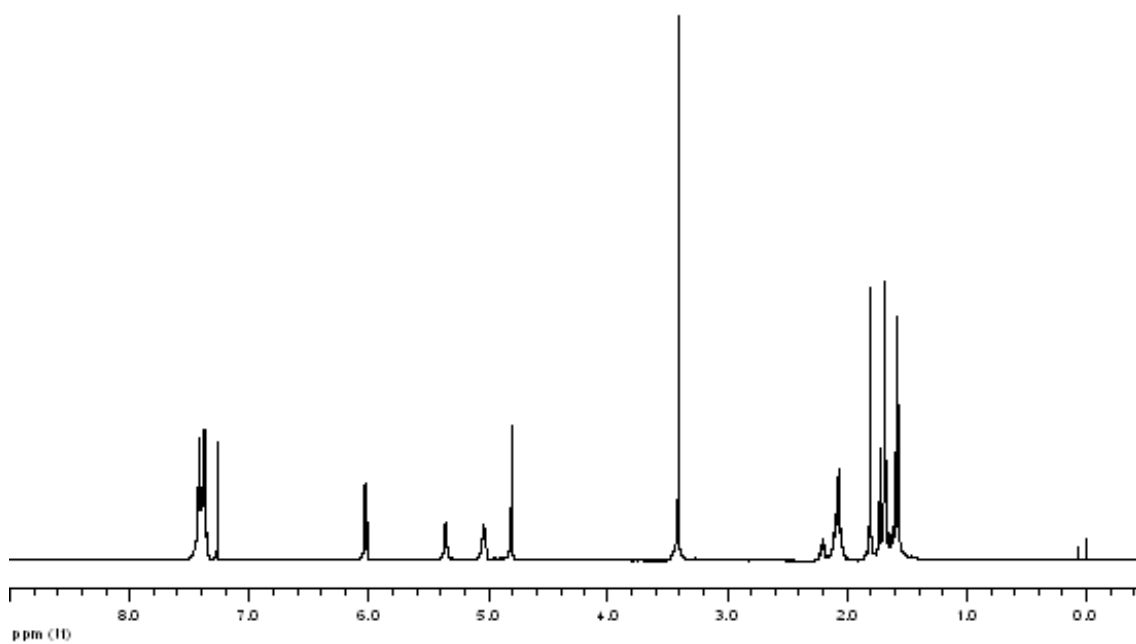

**Figure 41S.**  $^1\text{H}$ -NMR spectrum of (*R*)-MPA ester of compound **10** (500.13 MHz,  $\text{CDCl}_3$ , dr 74/26).

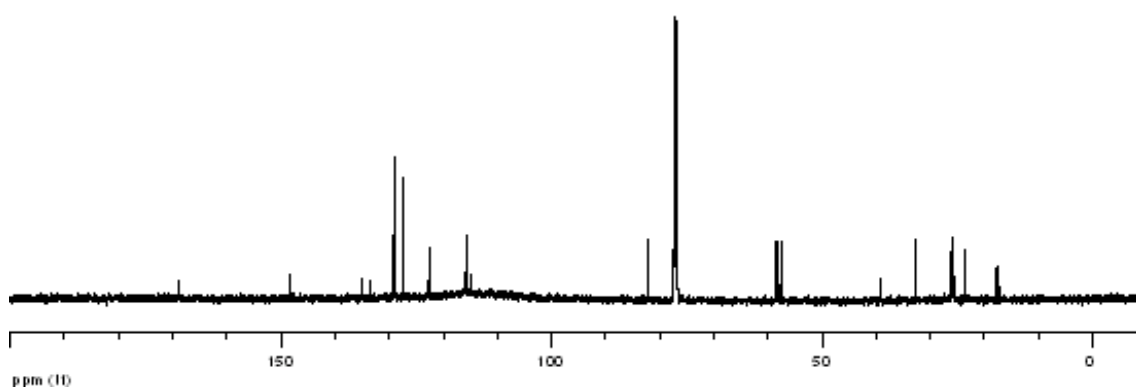

**Figure 42S.**  $^{13}\text{C}$ -NMR spectrum of (*R*)-MPA ester of compound **10** (125.77 MHz,  $\text{CDCl}_3$ , dr 74/26).

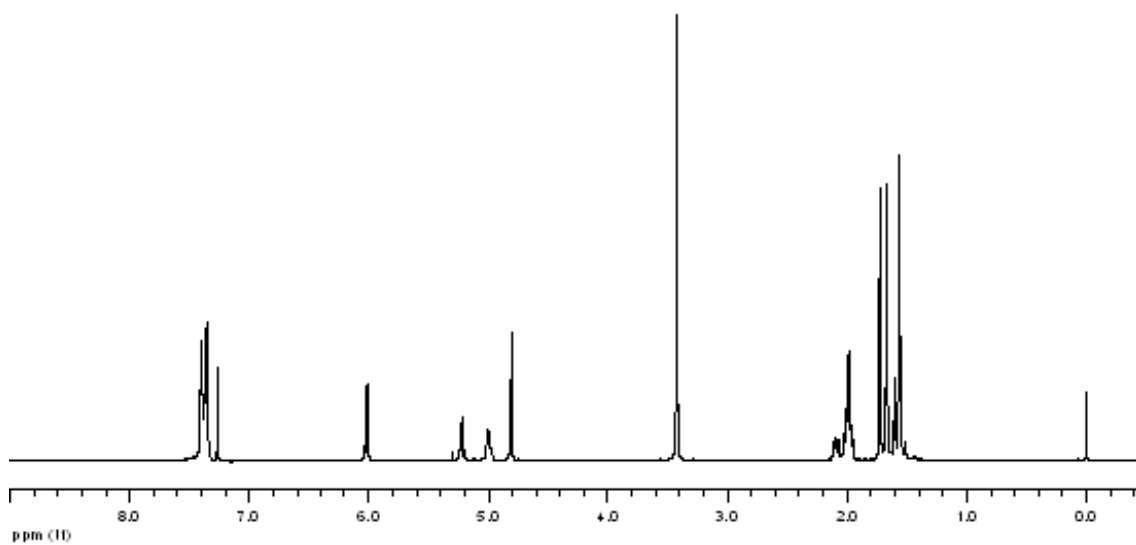

**Figure 43S.**  $^1\text{H}$ -NMR spectrum of (*S*)-MPA ester of compound **10** (500.13 MHz,  $\text{CDCl}_3$ ).

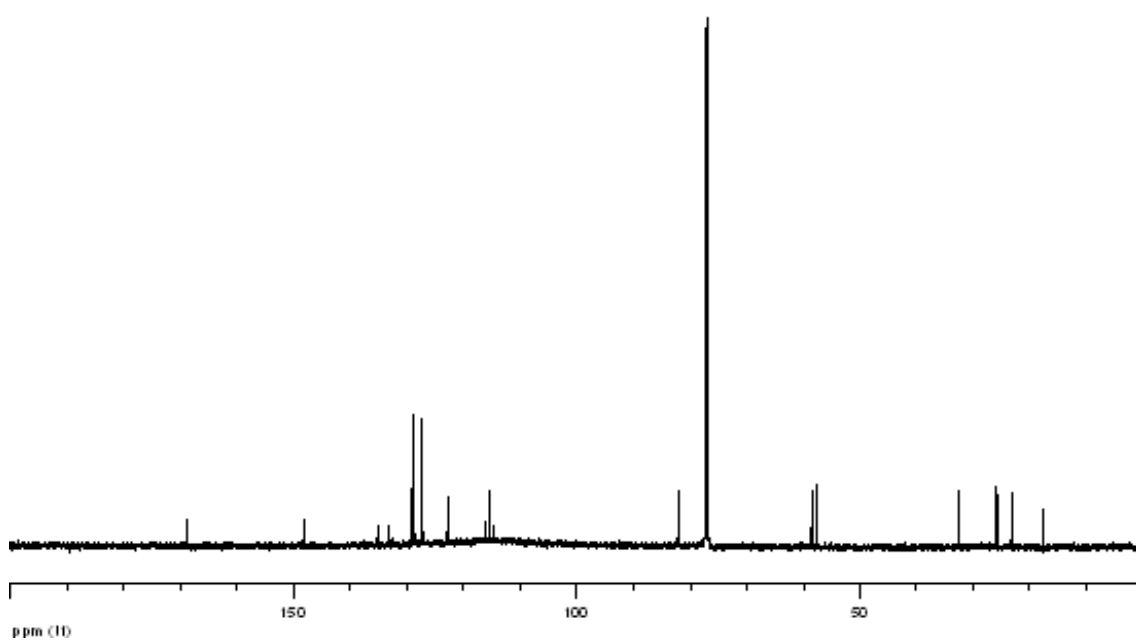

**Figure 44S.**  $^{13}\text{C}$ -NMR spectrum of (*S*)-MPA ester of compound **10** (125.77 MHz,  $\text{CDCl}_3$ ).

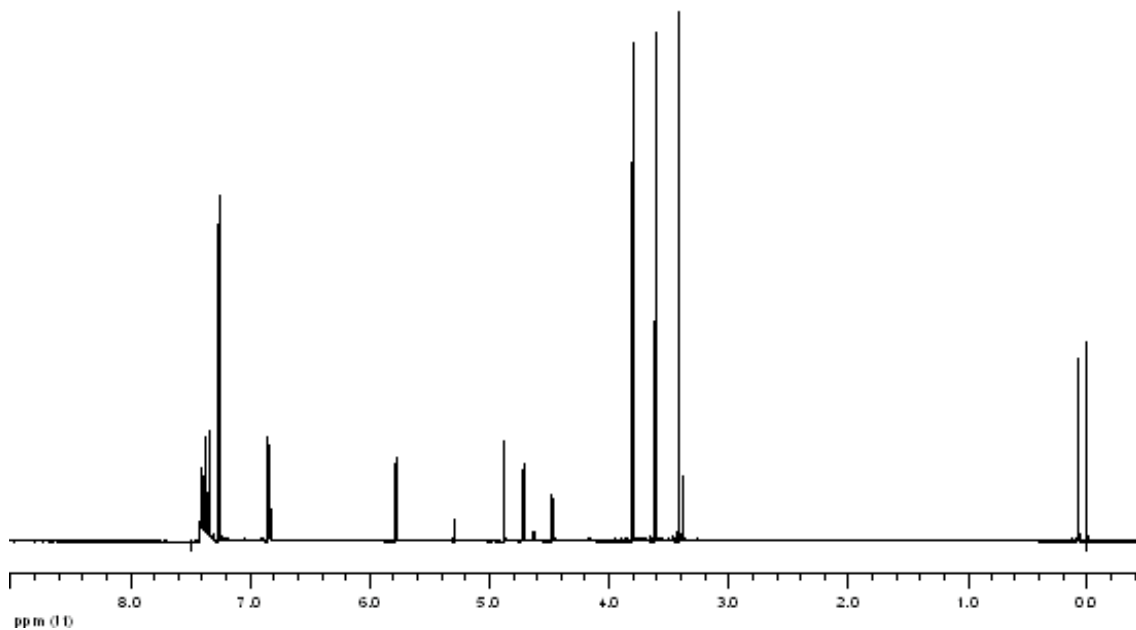

**Figure 45S.**  $^1\text{H}$ -NMR spectrum of (*R*)-MPA ester of compound **11** (500.13 MHz,  $\text{CDCl}_3$ ).

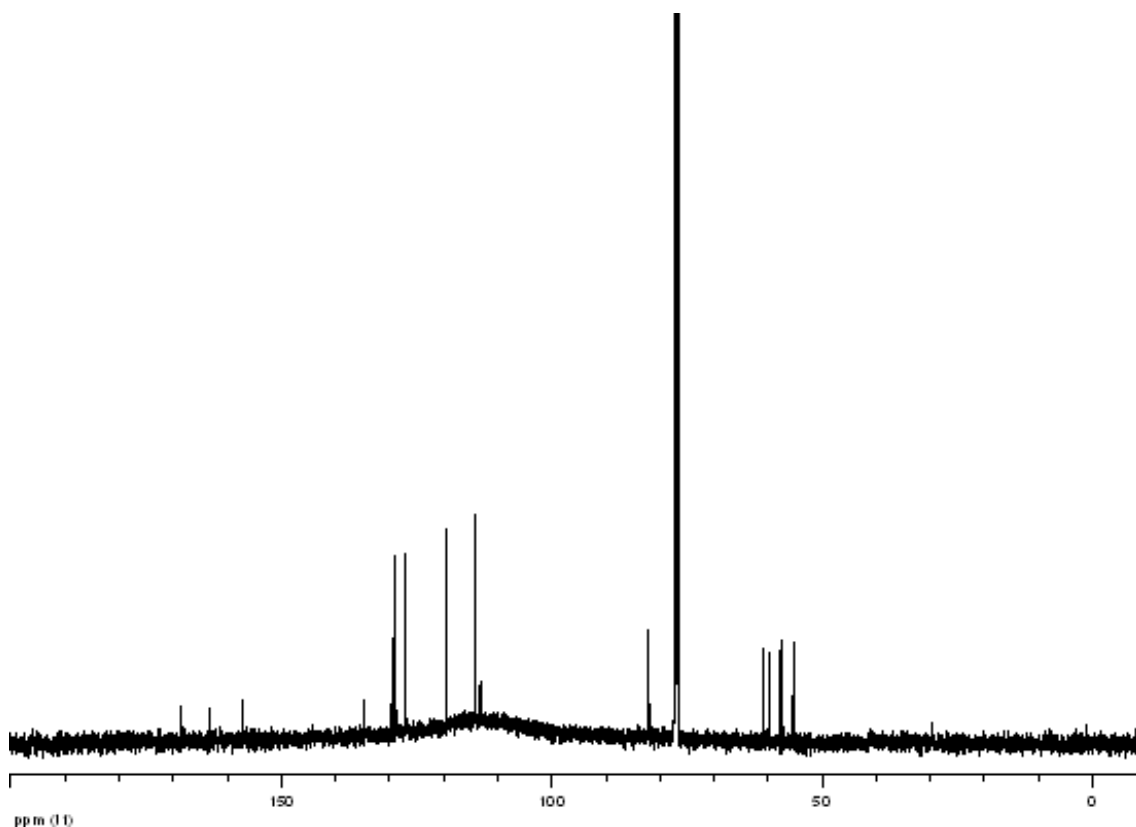

**Figure 46S.**  $^{13}\text{C}$ -NMR spectrum of (*R*)-MPA ester of compound **11** (125.77 MHz,  $\text{CDCl}_3$ ).



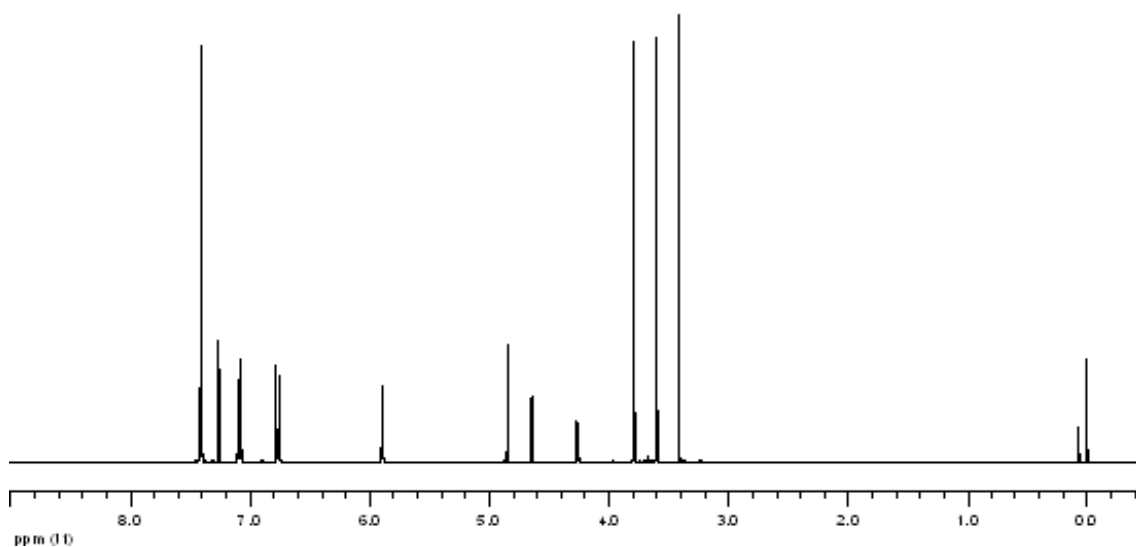

**Figure 47S.**  $^1\text{H}$ -NMR spectrum of (*S*)-MPA ester of compound **11** (399.97 MHz,  $\text{CDCl}_3$ ).

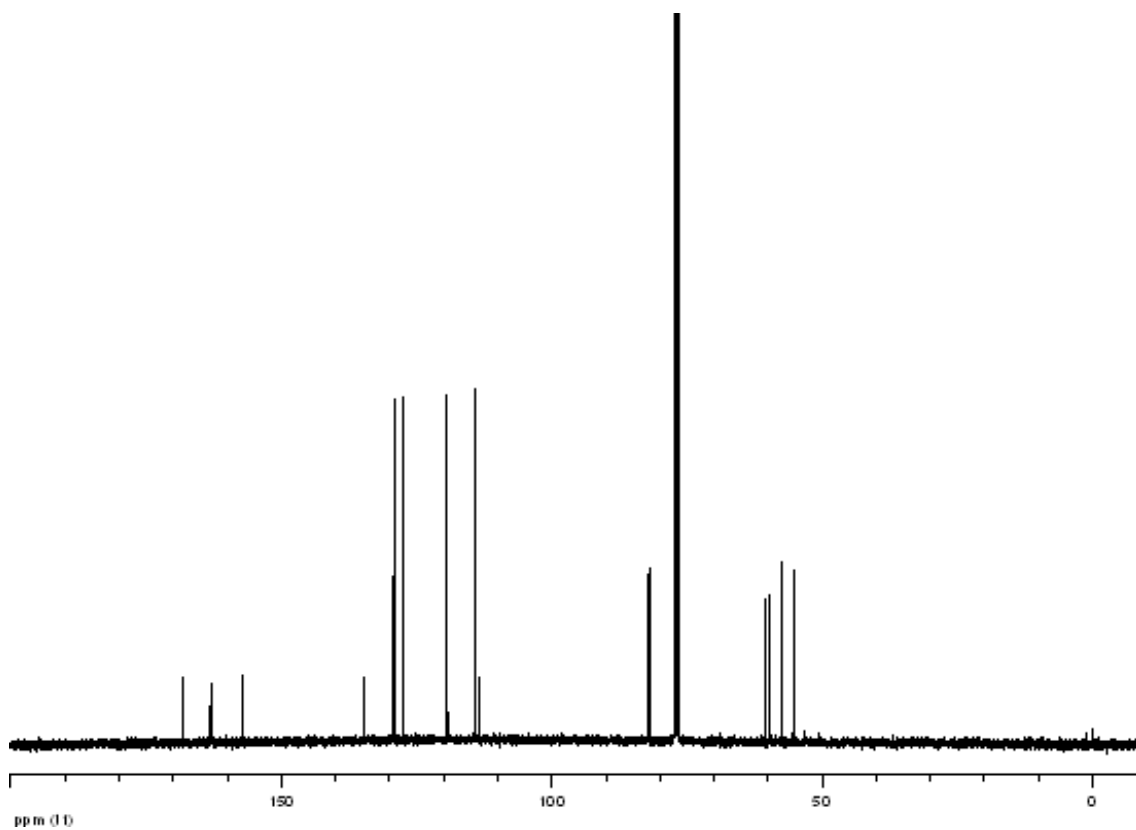

**Figure 48S.**  $^{13}\text{C}$ -NMR spectrum of (*S*)-MPA ester of compound **11** (100.58 MHz,  $\text{CDCl}_3$ ).

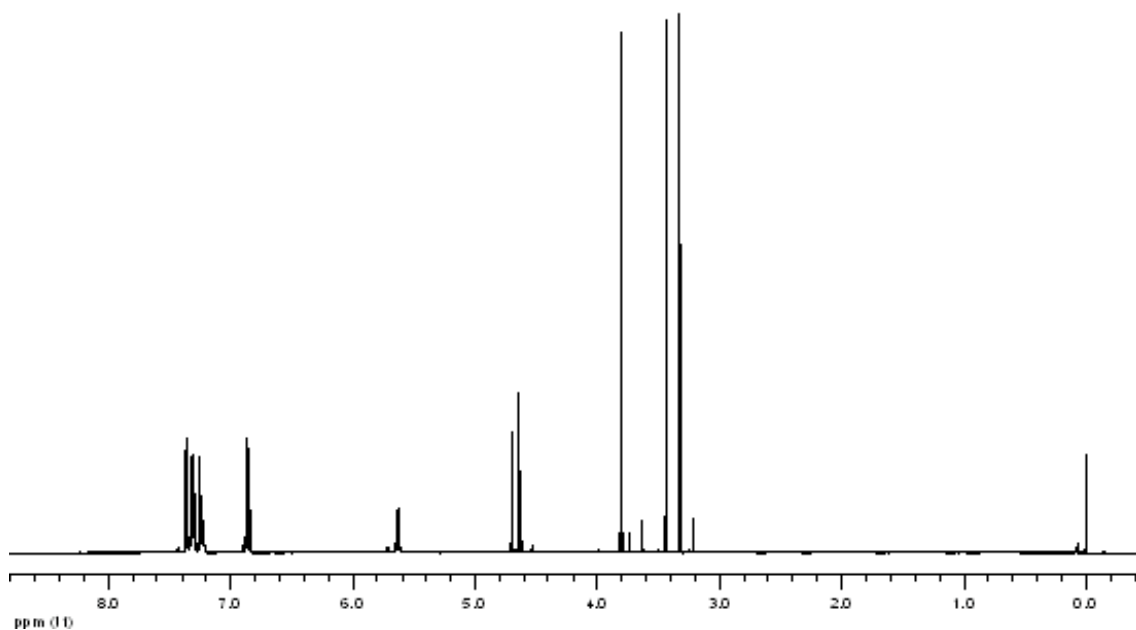

**Figure 49S.**  $^1\text{H}$ -NMR spectrum of (*R*)-MPA ester of compound **12** (399.97 MHz,  $\text{CDCl}_3$ , dr 95/5).

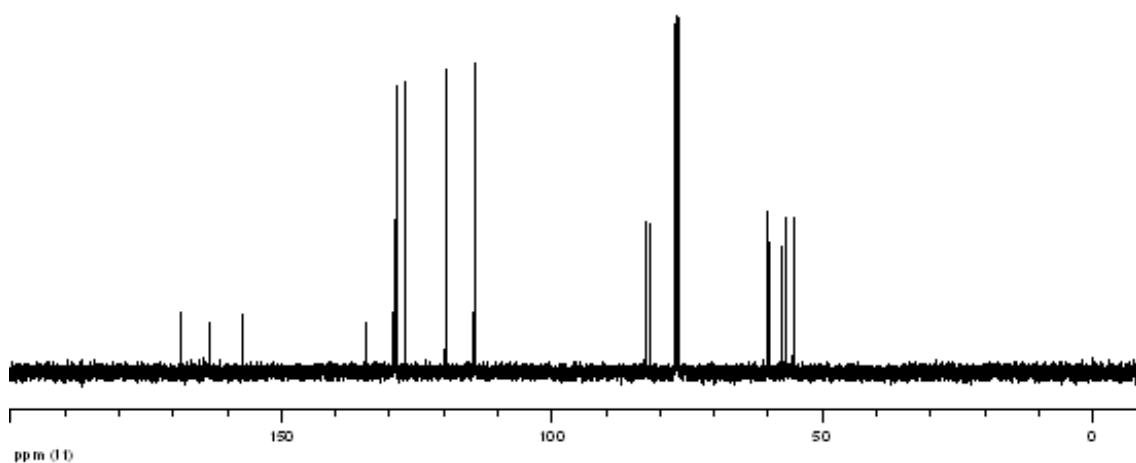

**Figure 50S.**  $^{13}\text{C}$ -NMR spectrum of (*R*)-MPA ester of compound **12** (100.58 MHz,  $\text{CDCl}_3$ , dr 95/5).

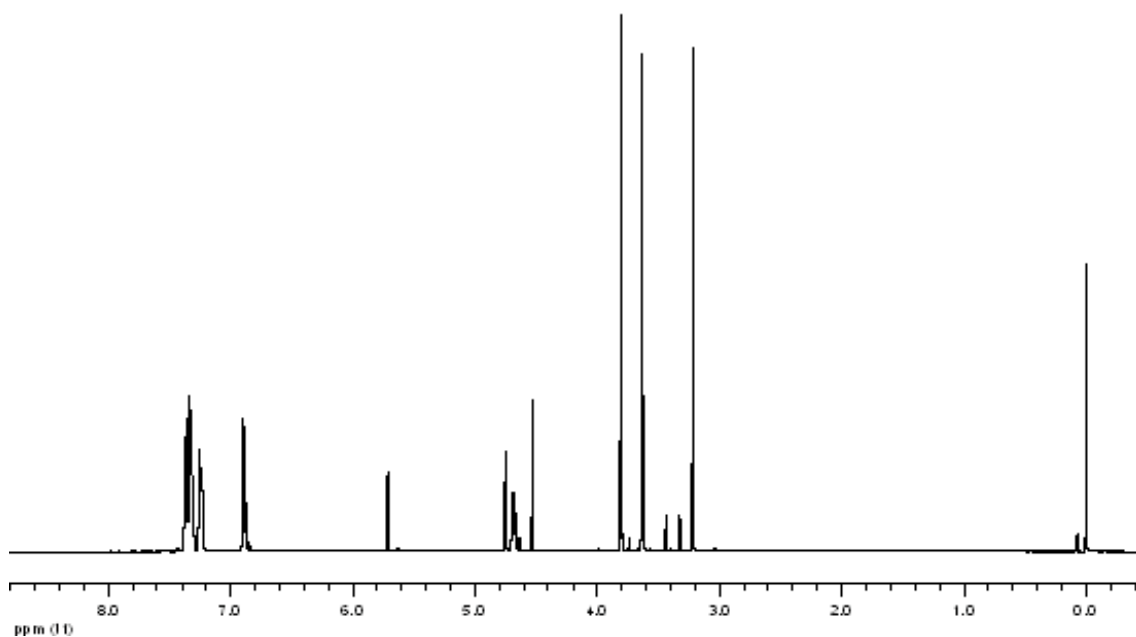

**Figure 51S.**  $^1\text{H}$ -NMR spectrum of (*S*)-MPA ester of compound **12** (399.97 MHz,  $\text{CDCl}_3$ , dr 94/6).

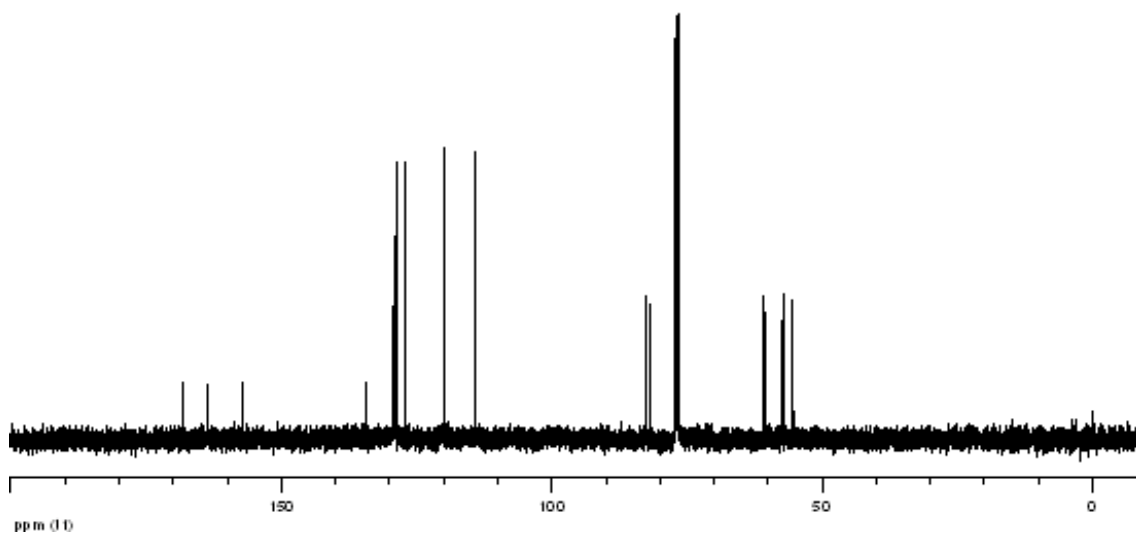

**Figure 52S.**  $^{13}\text{C}$ -NMR spectrum of (*S*)-MPA ester of compound **12** (100.58 MHz,  $\text{CDCl}_3$ , dr 94/6).

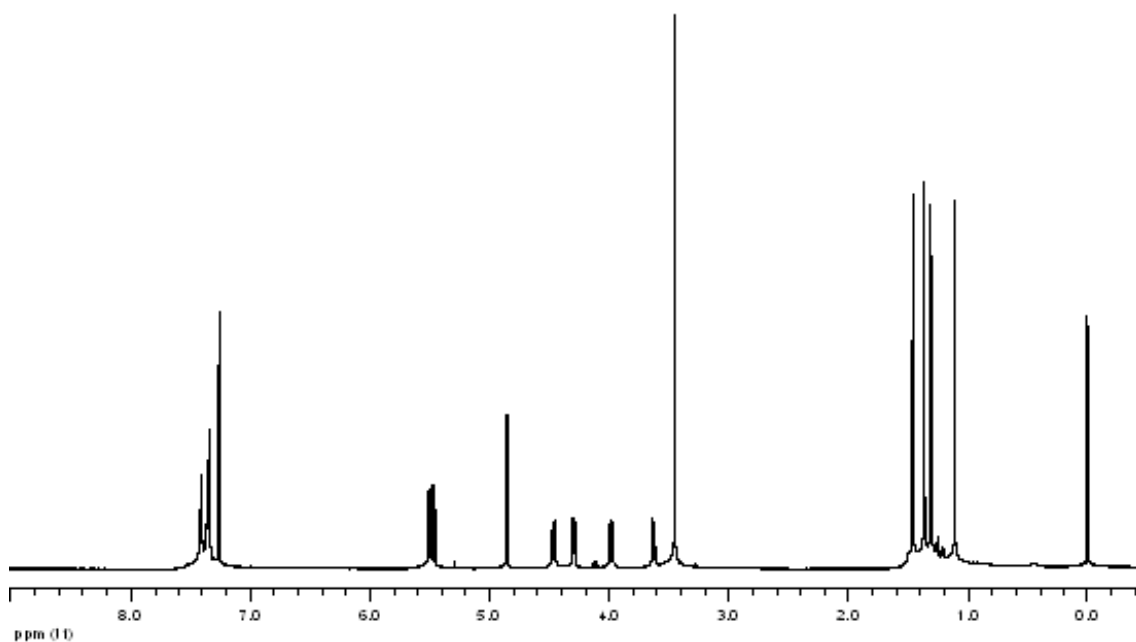

**Figure 53S.**  $^1\text{H}$ -NMR spectrum of (*R*)-MPA ester of compound **13** (399.97 MHz,  $\text{CDCl}_3$ ).

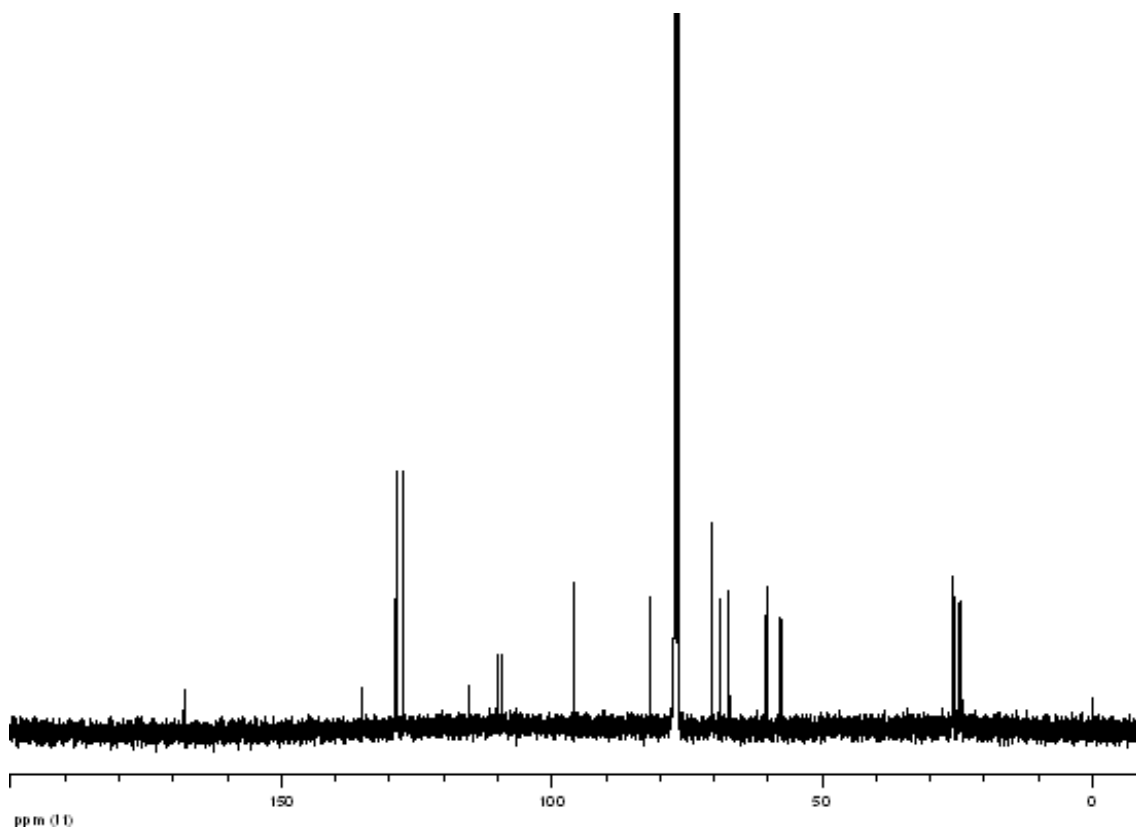

**Figure 54S.**  $^{13}\text{C}$ -NMR spectrum of (*R*)-MPA ester of compound **13** (100.58 MHz,  $\text{CDCl}_3$ ).

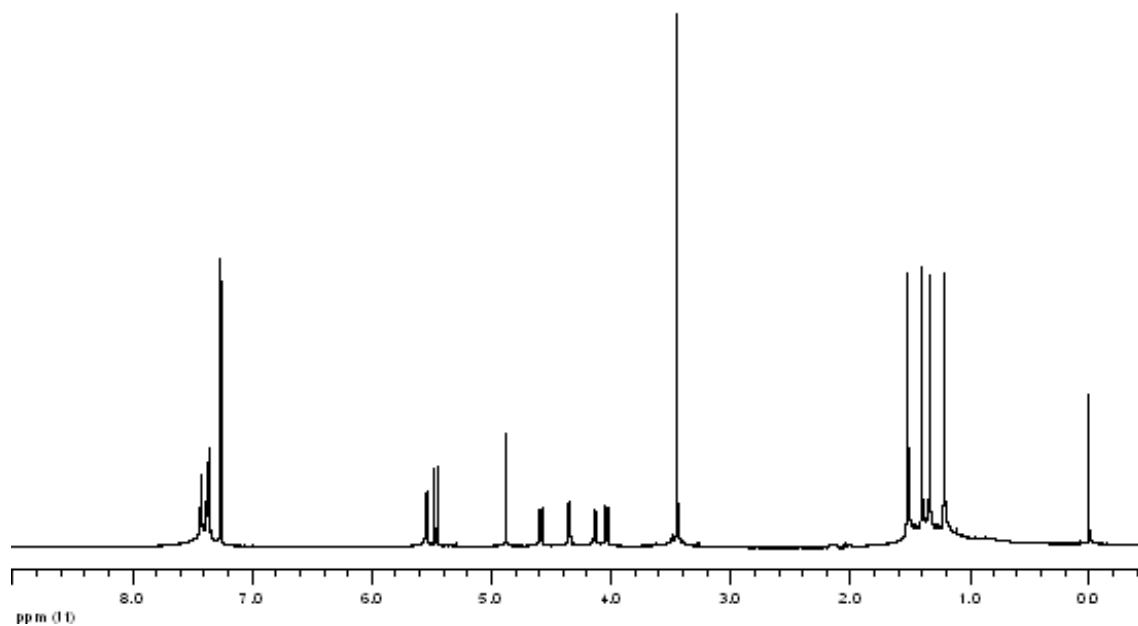

**Figure 55S.** <sup>1</sup>H-NMR spectrum of (*S*)-MPA ester of compound **13** (399.97 MHz, CDCl<sub>3</sub>).

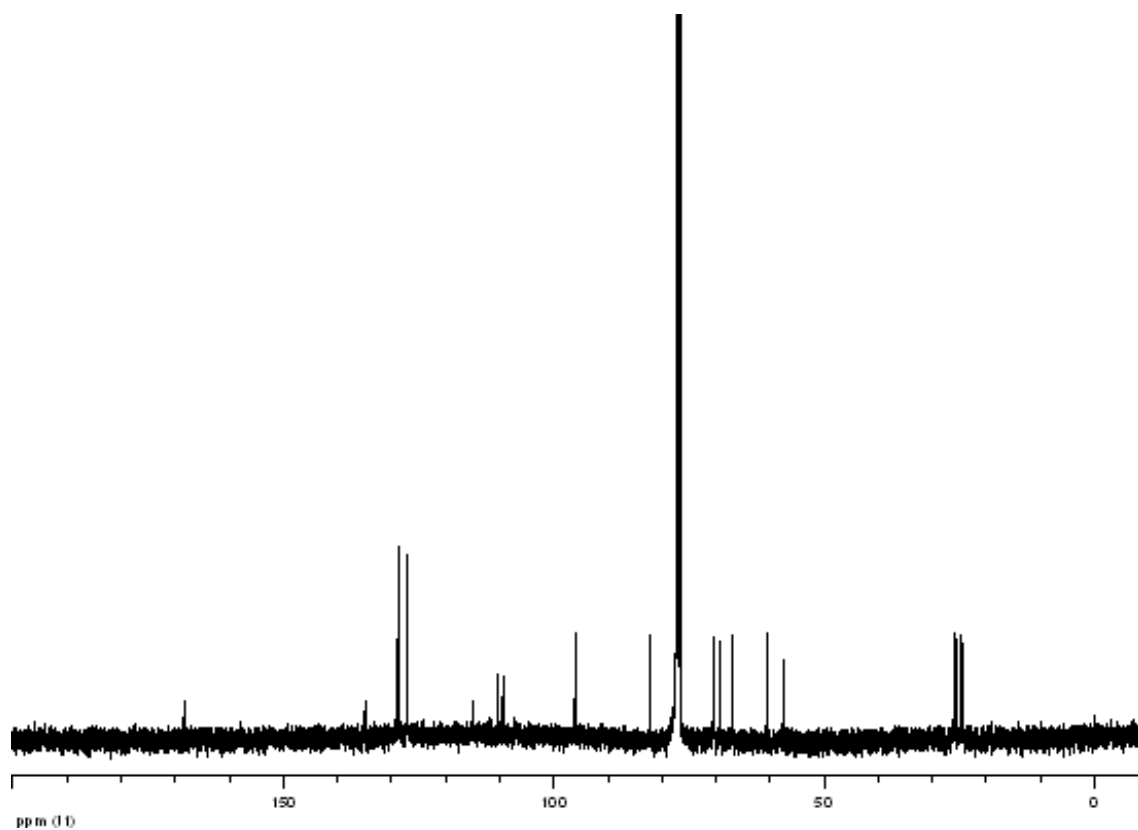

**Figure 56S.** <sup>13</sup>C-NMR spectrum of (*S*)-MPA ester of compound **13** (100.58 MHz, CDCl<sub>3</sub>).
